# Supplementary material for: Progress in reducing inequalities in cardiovascular disease mortality in Europe
Source: PubMed Central journal article supplement (PMC6952836; doi:10.1136/heartjnl-2019-315129), 2019-08-22
Supplement: heartjnl-2019-315129supp001.pdf [file heartjnl-2019-315129supp001.pdf]

## List of Supplementary Tables

|                                                                                                                                                                                                                                                                                                                                                      |    |
|------------------------------------------------------------------------------------------------------------------------------------------------------------------------------------------------------------------------------------------------------------------------------------------------------------------------------------------------------|----|
| Supplementary Table S 1. Overview and characteristics of data sources .....                                                                                                                                                                                                                                                                          | 2  |
| Supplementary Table S 2. List of the ICD codes of the causes of death .....                                                                                                                                                                                                                                                                          | 3  |
| Supplementary Table S 2. Distribution of person-years (py) and cardiovascular disease (CVD), ischaemic heart disease (IHD) and cerebrovascular disease (CeVD) deaths by educational level, period and population, men, 35-79 years.....                                                                                                              | 4  |
| Supplementary Table S 3. Distribution of person-years (py) and cardiovascular disease (CVD), ischaemic heart disease (IHD) and cerebrovascular disease (CeVD) deaths by educational level, period and population, women, 35-79 years.....                                                                                                            | 5  |
| Supplementary Table S 4. Distribution of person-years (py) and cardiovascular disease (CVD), ischaemic heart disease (IHD) and cerebrovascular disease (CeVD) deaths by occupational class, period and population, men, 35-64 years.....                                                                                                             | 6  |
| Supplementary Table S 6. Population-Attributable Risk (PAR, per 100,000 person-year), Population-Attributable Fraction (PAF, %), Relative Index of Inequality (RII), Slope Index of Inequality (SII) with 95% confidence intervals (CI) of education for cardiovascular disease mortality between beginning of observation periods and 2010-14. .... | 7  |
| Supplementary Table S 7. Age-standardised cardiovascular disease mortality rates per 100,000 person years, by occupational class, period and population, men, 35-64 years.....                                                                                                                                                                       | 8  |
| Supplementary Table S 8. Age-standardised ischaemic heart disease mortality rates per 100,000 person years, by occupational class, period and population, men, 35-64 years.....                                                                                                                                                                      | 9  |
| Supplementary Table S 9. Age-standardised cerebrovascular disease mortality rates per 100,000 person years, by occupational class, period and population, men, 35-64 years.....                                                                                                                                                                      | 10 |
| Supplementary Table S 10. Relative and absolute annualised changes in age-standardised mortality rates between end and beginning of observation periods for cardiovascular, ischaemic and cerebrovascular disease mortality, by upper non-manual and manual occupation, men, 35-64 years .....                                                       | 11 |
| Supplementary Table S 11. Population-Attributable Risk (PAR, per 100,000 person-year) and Population-Attributable Fraction (PAF, %) of occupational class for cardiovascular disease mortality, ischaemic heart disease mortality and cerebrovascular disease mortality between beginning of observation periods and 2010-14 .....                   | 12 |

## List of Supplementary Figures

|                                                                                                                                                                                                                                                     |    |
|-----------------------------------------------------------------------------------------------------------------------------------------------------------------------------------------------------------------------------------------------------|----|
| Supplementary Figure S 1. Trend in ischaemic heart disease mortality (ASMR: age-standardised mortality rates) and inequalities (Relative and Slope Index of Inequality) in mortality by educational level, population and gender, 35-79 years ..... | 13 |
| Supplementary Figure S 2. Trend in cerebrovascular disease mortality (ASMR: age-standardised mortality rates) and inequalities (Relative and Slope Index of Inequality) in mortality by educational level, population and gender, 35-79 years ..... | 14 |
| Supplementary Figure S 3. Changes in absolute and relative educational inequalities in ischaemic heart disease mortality between 2000-04 and 2010-14, by population and gender, 35-79 years.....                                                    | 15 |
| Supplementary Figure S 4. Changes in absolute and relative educational inequalities in cerebrovascular disease mortality between 2000-04 and 2010-14, by population and gender, 35-79 years.....                                                    | 15 |
| Supplementary Figure S 5. Trends in cardiovascular disease mortality (ASMR: age-standardised mortality rates) and inequalities by occupation class, men, 35-64 years .....                                                                          | 16 |
| Supplementary Figure S 6. Trends in Relative Index of Inequality and Slope Index of Inequality for ischaemic heart disease and other heart diseases mortality by education .....                                                                    | 18 |

Supplementary Table S 1. Overview and characteristics of data sources

| Population                | Design                   | Observation periods (census year) |                     |                     |                     |                     | Geographic coverage                           | Population coverage                              | Occupational class availability                                                                                             | Educational level availability                       |
|---------------------------|--------------------------|-----------------------------------|---------------------|---------------------|---------------------|---------------------|-----------------------------------------------|--------------------------------------------------|-----------------------------------------------------------------------------------------------------------------------------|------------------------------------------------------|
|                           |                          | 1990-1994                         | 1995-1999           | 2000-2004           | 2005-2009           | 2010-2014           |                                               |                                                  |                                                                                                                             |                                                      |
| Nordic countries          |                          |                                   |                     |                     |                     |                     |                                               |                                                  |                                                                                                                             |                                                      |
| <b>Finland</b>            | Longitudinal             | 1990-1995<br>(1990)               | 1995-2000           | 2000-2005<br>(2000) | 2005-2010           | 2010-2014*          | National                                      | Whole population<br>(*80% representative sample) | upper non-manual, lower non-manual, manual, farmers, self-employed                                                          | Low (ISCED 0,1,2), mid (ISCED 3,4), high (ISCED 5,6) |
| <b>Denmark</b>            | Longitudinal             | na<br>na                          | 1995-1999<br>(1995) | 2000-2004<br>(2000) | 2005-2009<br>(2005) | 2010-2014<br>(2010) | National                                      | Whole population                                 | upper non-manual, lower non-manual, manual, farmers, self-employed                                                          | Low (ISCED 0,1,2), mid (ISCED 3,4), high (ISCED 5,6) |
| Western countries         |                          |                                   |                     |                     |                     |                     |                                               |                                                  |                                                                                                                             |                                                      |
| <b>England and Wales</b>  | Longitudinal             | 1991-1996<br>(1991)               | 1996-2001           | 2001-2006<br>(2001) | 2006-2011           | 2011-2013<br>(2011) | National                                      | 1% representative sample                         | upper non-manual, lower non-manual, manual, farmers (not available), self-employed (only 2001-2011)                         | Low and mid (ISCED 0-4), high (ISCED 5,6)            |
| <b>Austria</b>            | Longitudinal             | 1991-1992<br>(1991)               |                     | 2001-2002<br>(2001) |                     | 2011-2013<br>(2011) | National                                      | Whole population                                 | non-manual (upper and lower combined), manual, farmers (not available in 2011), self-employed                               | Low (ISCED 0,1,2), mid (ISCED 3,4), high (ISCED 5,6) |
| <b>Switzerland</b>        | Longitudinal             | 1990-1995<br>(1990)               | 1995-2000           | 2000-2005<br>(2000) | 2005-2010           | 2010-2014<br>(2010) | National                                      | Swiss nationals                                  | upper non-manual, lower non-manual, manual, farmers, self-employed                                                          | Low (ISCED 0,1,2), mid (ISCED 3,4), high (ISCED 5,6) |
| Southern countries        |                          |                                   |                     |                     |                     |                     |                                               |                                                  |                                                                                                                             |                                                      |
| <b>Spain, Barcelona</b>   | Repeated cross-sectional | 1992-1996                         | 1997-2001           | 2002-2006           | 2007-2010           | 2010-2014           | City                                          | Whole population                                 | Not available                                                                                                               | Low (ISCED 0,1,2), mid (ISCED 3,4), high (ISCED 5,6) |
| <b>Italy, Turin</b>       | Longitudinal             | 1991-1996<br>(1991)               | 1996-2001           | 2001-2006<br>(2001) | 2006-2011           | 2011-2013<br>(2011) | City                                          | Whole population                                 | upper non-manual, lower non-manual, manual, farmers (not available in 1991), self-employed; occ class not available in 2011 | Low (ISCED 0,1,2), mid (ISCED 3,4), high (ISCED 5,6) |
| <b>Italy, Emilia</b>      | Longitudinal             | na<br>na                          | na                  | 2001-2006<br>(2001) | 2006-2011           | 2011-2016<br>(2011) | Three cities (Bologna, Modena, Reggio Emilia) | Whole population                                 | Not available                                                                                                               | Low (ISCED 0,1,2), mid (ISCED 3,4), high (ISCED 5,6) |
| Central-Eastern countries |                          |                                   |                     |                     |                     |                     |                                               |                                                  |                                                                                                                             |                                                      |
| <b>Hungary</b>            | Cross-sectional          | 1988-1991<br>(1990)               | na                  | 1999-2002<br>(2001) | na                  | 2010-2012<br>(2011) | National                                      | Whole population                                 | Not available                                                                                                               | Low (ISCED 0,1,2), mid (ISCED 3,4), high (ISCED 5,6) |
| <b>Poland</b>             | Cross-sectional          | na<br>na                          | na                  | 2001-2003<br>(2002) | na                  | 2010-2012<br>(2011) | National                                      | Whole population                                 | Not available                                                                                                               | Low (ISCED 0,1,2), mid (ISCED 3,4), high (ISCED 5,6) |
| Baltic countries          |                          |                                   |                     |                     |                     |                     |                                               |                                                  |                                                                                                                             |                                                      |
| <b>Estonia</b>            | Longitudinal             | na<br>na                          | na                  | 2000-2005<br>(2001) | 2006-2011           | 2012-2015<br>(2011) | National                                      | Whole population                                 | upper non-manual, lower non-manual, manual, farmers                                                                         | Low (ISCED 0,1,2), mid (ISCED 3,4), high (ISCED 5,6) |
| <b>Lithuania</b>          | Longitudinal             | na<br>na                          | na                  | 2001-2005<br>(2001) | 2006-2009           | 2011-2014<br>(2011) | National                                      | Whole population                                 | upper non-manual, lower non-manual, manual, farmers, self-employed                                                          | Low (ISCED 0,1,2), mid (ISCED 3,4), high (ISCED 5,6) |

ISCED: International standard classification of education

Supplementary Table S 2. List of the ICD codes of the causes of death

|                                | <b>ICD 8 codes</b> | <b>ICD 9 codes</b> | <b>ICD 10 codes</b> |
|--------------------------------|--------------------|--------------------|---------------------|
| <b>Cardiovascular disease</b>  | 390-458            | 390-459            | I00-I99             |
| <b>Ischaemic heart disease</b> | 410-414            | 410-414            | I20-I25             |
| <b>Cerebrovascular disease</b> | 430-438            | 430-438            | I60-I69             |
| <b>Other heart disease</b>     | 420-429            | 415-417; 420-429   | I26-I52; I98        |

Supplementary Table S 3. Distribution of person-years (py) and cardiovascular disease (CVD), ischaemic heart disease (IHD) and cerebrovascular disease (CeVD) deaths by educational level, period and population, men, 35-79 years

|                   |        | 1990-1994 |       |       |       | 1995-1999 |       |       |      | 2000-2004 |        |       |       | 2005-2009 |       |       |      | 2010-2014 |        |       |       |
|-------------------|--------|-----------|-------|-------|-------|-----------|-------|-------|------|-----------|--------|-------|-------|-----------|-------|-------|------|-----------|--------|-------|-------|
|                   |        | py        | CVD   | IHD   | CeVD  | py        | CVD   | IHD   | CeVD | py        | CVD    | IHD   | CeVD  | py        | CVD   | IHD   | CeVD | py        | CVD    | IHD   | CeVD  |
| Finland           | Low    | 3063862   | 30020 | 20488 | 5260  | 2738419   | 24895 | 16756 | 4326 | 2582030   | 21077  | 13764 | 3718  | 2225260   | 17397 | 10947 | 2953 | 1622578   | 11202  | 6762  | 1941  |
|                   | Middle | 1700099   | 5121  | 3330  | 941   | 1851423   | 5542  | 3607  | 968  | 2432850   | 6181   | 3879  | 1057  | 2501196   | 7289  | 4319  | 1129 | 2305363   | 6487   | 3703  | 1050  |
|                   | High   | 1300251   | 3665  | 2384  | 705   | 1364150   | 3491  | 2259  | 648  | 1788264   | 3543   | 2140  | 691   | 1830589   | 3806  | 2228  | 664  | 1787056   | 3216   | 1808  | 579   |
| Denmark           | Low    | -         | -     | -     | -     | 2115048   | 12679 | 7243  | 2230 | 2107680   | 12668  | 6072  | 2672  | 1968746   | 8884  | 3859  | 1946 | 1829193   | 6630   | 2685  | 1495  |
|                   | Middle | -         | -     | -     | -     | 2744305   | 8387  | 4677  | 1519 | 3104266   | 9182   | 4308  | 1925  | 3316392   | 7754  | 3292  | 1791 | 3462344   | 6962   | 2891  | 1516  |
|                   | High   | -         | -     | -     | -     | 1255152   | 2478  | 1321  | 487  | 1502674   | 2870   | 1239  | 679   | 1734890   | 2476  | 966   | 581  | 1964224   | 2276   | 845   | 514   |
| England and Wales | Low    | 470395    | 3581  | 2449  | 558   | 453846    | 3006  | 1951  | 504  | 468847    | 2170   | 1348  | 395   | 445351    | 1639  | 999   | 264  | 229763    | 611    | 390   | 85    |
|                   | Middle | -         | -     | -     | -     | -         | -     | -     | -    | -         | -      | -     | -     | -         | -     | -     | -    | -         | -      | -     | -     |
|                   | High   | 111191    | 355   | 234   | 56    | 115782    | 325   | 214   | 54   | 131313    | 263    | 176   | 41    | 134084    | 233   | 131   | 38   | 120465    | 163    | 107   | 23    |
| Austria           | Low    | 525388    | 4389  | 2170  | 954   | -         | -     | -     | -    | 441786    | 3234   | 1652  | 597   | -         | -     | -     | -    | 746441    | 3421   | 1810  | 551   |
|                   | Middle | 1063871   | 5527  | 3042  | 986   | -         | -     | -     | -    | 1400269   | 4903   | 2780  | 757   | -         | -     | -     | -    | 2864726   | 6915   | 3991  | 984   |
|                   | High   | 130090    | 436   | 245   | 87    | -         | -     | -     | -    | 195742    | 399    | 206   | 69    | -         | -     | -     | -    | 903567    | 1285   | 726   | 195   |
| Switzerland       | Low    | 1283900   | 11453 | 5666  | 1758  | 1078287   | 8622  | 4441  | 1309 | 1043983   | 5894   | 2930  | 891   | 891006    | 4477  | 2209  | 595  | 757055    | 2893   | 1346  | 360   |
|                   | Middle | 3523059   | 14195 | 7843  | 1916  | 3480714   | 12565 | 6992  | 1676 | 3623813   | 8641   | 4543  | 1190  | 3557759   | 8168  | 4200  | 1025 | 3191676   | 6052   | 2902  | 765   |
|                   | High   | 1528247   | 3871  | 2113  | 529   | 1553571   | 3642  | 2033  | 517  | 2145411   | 3199   | 1706  | 432   | 2165592   | 3064  | 1594  | 404  | 1858163   | 2369   | 1111  | 308   |
| Spain, Barcelona  | Low    | 1237926   | 5304  | 2319  | 1348  | 1100921   | 4903  | 2222  | 1146 | 1050171   | 3899   | 1634  | 874   | 792854    | 2361  | 960   | 491  | 565691    | 1379   | 551   | 264   |
|                   | Middle | 350373    | 899   | 421   | 185   | 391459    | 943   | 448   | 190  | 498351    | 836    | 359   | 163   | 440474    | 615   | 250   | 121  | 351670    | 469    | 216   | 77    |
|                   | High   | 351099    | 739   | 347   | 169   | 382422    | 772   | 353   | 152  | 458786    | 713    | 322   | 122   | 422162    | 506   | 205   | 103  | 361180    | 336    | 142   | 67    |
| Italy, Turin      | Low    | 802403    | 4236  | 1762  | 1044  | 678424    | 3553  | 1457  | 812  | 661870    | 2810   | 1206  | 643   | 536306    | 2125  | 920   | 517  | 254954    | 759    | 325   | 174   |
|                   | Middle | 244121    | 706   | 323   | 134   | 230623    | 611   | 258   | 130  | 326521    | 652    | 275   | 139   | 300286    | 528   | 232   | 115  | 185925    | 295    | 124   | 65    |
|                   | High   | 122230    | 357   | 148   | 73    | 111935    | 286   | 112   | 57   | 163619    | 297    | 133   | 61    | 150338    | 239   | 107   | 61   | 95757     | 116    | 50    | 25    |
| Italy, Emilia     | Low    | -         | -     | -     | -     | -         | -     | -     | -    | 465378    | 2069   | 1052  | 373   | 375878    | 1408  | 655   | 274  | 387631    | 947    | 412   | 180   |
|                   | Middle | -         | -     | -     | -     | -         | -     | -     | -    | 262980    | 443    | 236   | 69    | 247752    | 367   | 167   | 73   | 352386    | 341    | 168   | 62    |
|                   | High   | -         | -     | -     | -     | -         | -     | -     | -    | 157449    | 257    | 121   | 52    | 147061    | 187   | 87    | 35   | 215919    | 162    | 66    | 33    |
| Hungary           | Low    | 6865976   | 88657 | 39480 | 24367 | -         | -     | -     | -    | 6221876   | 76848  | 35582 | 20655 | -         | -     | -     | -    | 4448391   | 38777  | 20249 | 8244  |
|                   | Middle | 1469996   | 9982  | 5548  | 2175  | -         | -     | -     | -    | 1960936   | 10326  | 5391  | 2391  | -         | -     | -     | -    | 1865685   | 7482   | 4145  | 1324  |
|                   | High   | 1139288   | 6127  | 3551  | 1229  | -         | -     | -     | -    | 1363220   | 5881   | 3167  | 1364  | -         | -     | -     | -    | 1308606   | 4279   | 2465  | 721   |
| Poland            | Low    | -         | -     | -     | -     | -         | -     | -     | -    | 15636906  | 139782 | 53409 | 30957 | -         | -     | -     | -    | 15147009  | 115255 | 37521 | 22605 |
|                   | Middle | -         | -     | -     | -     | -         | -     | -     | -    | 7092219   | 27692  | 12001 | 5758  | -         | -     | -     | -    | 7752717   | 29308  | 10423 | 5423  |
|                   | High   | -         | -     | -     | -     | -         | -     | -     | -    | 2875902   | 9000   | 4105  | 1810  | -         | -     | -     | -    | 3922338   | 9484   | 3393  | 1789  |
| Estonia           | Low    | -         | -     | -     | -     | -         | -     | -     | -    | 498889    | 10120  | 5962  | 2426  | 378745    | 7620  | 3907  | 1260 | 242230    | 3352   | 1481  | 413   |
|                   | Middle | -         | -     | -     | -     | -         | -     | -     | -    | 911196    | 5801   | 3258  | 1287  | 912855    | 6091  | 2914  | 984  | 710737    | 3684   | 1642  | 422   |
|                   | High   | -         | -     | -     | -     | -         | -     | -     | -    | 297283    | 1624   | 942   | 389   | 291064    | 1556  | 810   | 245  | 270683    | 995    | 433   | 122   |
| Lithuania         | Low    | -         | -     | -     | -     | -         | -     | -     | -    | 1006759   | 19479  | 12684 | 3908  | 670489    | 14781 | 9392  | 3129 | 523087    | 9406   | 6066  | 2092  |
|                   | Middle | -         | -     | -     | -     | -         | -     | -     | -    | 2020083   | 10070  | 6175  | 1801  | 1757597   | 10479 | 6205  | 1812 | 1697485   | 9959   | 6167  | 1913  |
|                   | High   | -         | -     | -     | -     | -         | -     | -     | -    | 597078    | 2685   | 1720  | 479   | 501802    | 2653  | 1588  | 521  | 538928    | 2425   | 1570  | 496   |

Supplementary Table S 4. Distribution of person-years (py) and cardiovascular disease (CVD), ischaemic heart disease (IHD) and cerebrovascular disease (CeVD) deaths by educational level, period and population, women, 35-79 years

|                   |        | 1990-1994 |       |       |       | 1995-1999 |       |      |      | 2000-2004 |        |       |       | 2005-2009 |       |      |      | 2010-2014 |       |       |       |
|-------------------|--------|-----------|-------|-------|-------|-----------|-------|------|------|-----------|--------|-------|-------|-----------|-------|------|------|-----------|-------|-------|-------|
|                   |        | py        | CVD   | IHD   | CeVD  | py        | CVD   | IHD  | CeVD | py        | CVD    | IHD   | CeVD  | py        | CVD   | IHD  | CeVD | py        | CVD   | IHD   | CeVD  |
| Finland           | Low    | 3616611   | 21177 | 12019 | 5845  | 3166780   | 15959 | 9040 | 4371 | 2753025   | 12238  | 6653  | 3380  | 2285947   | 8626  | 4477 | 2223 | 1522433   | 5293  | 2443  | 1442  |
|                   | Middle | 1819277   | 2666  | 1387  | 835   | 1951567   | 2582  | 1340 | 755  | 2405151   | 2619   | 1221  | 830   | 2439843   | 2647  | 1202 | 771  | 2158583   | 2382  | 1046  | 671   |
|                   | High   | 1229839   | 1108  | 511   | 381   | 1346273   | 1095  | 499  | 363  | 2037788   | 1044   | 454   | 361   | 2164519   | 1183  | 468  | 394  | 2248972   | 1129  | 402   | 370   |
| Denmark           | Low    | -         | -     | -     | -     | 2952647   | 9764  | 4632 | 2427 | 2808146   | 10494  | 4109  | 2981  | 2430715   | 7270  | 2538 | 2203 | 2109303   | 5213  | 1644  | 1548  |
|                   | Middle | -         | -     | -     | -     | 2058831   | 2380  | 998  | 692  | 2487065   | 3190   | 1083  | 1052  | 2780228   | 2720  | 819  | 925  | 2963329   | 2416  | 718   | 779   |
|                   | High   | -         | -     | -     | -     | 1275369   | 788   | 287  | 263  | 1594865   | 1090   | 329   | 403   | 1947243   | 1015  | 282  | 370  | 2340507   | 1028  | 249   | 346   |
| England and Wales | Low    | 547626    | 2468  | 1380  | 658   | 523884    | 2077  | 1112 | 538  | 551468    | 1543   | 753   | 425   | 522606    | 1055  | 480  | 282  | 286686    | 443   | 189   | 113   |
|                   | Middle | -         | -     | -     | -     | -         | -     | -    | -    | -         | -      | -     | -     | -         | -     | -    | -    | -         | -     | -     | -     |
|                   | High   | 82117     | 113   | 47    | 39    | 87852     | 113   | 50   | 35   | 129357    | 117    | 44    | 45    | 133352    | 108   | 43   | 34   | 118696    | 64    | 23    | 15    |
| Austria           | Low    | 1089820   | 6672  | 2630  | 1798  | -         | -     | -    | -    | 945397    | 4510   | 1939  | 1083  | -         | -     | -    | -    | 1489246   | 3951  | 1742  | 792   |
|                   | Middle | 812279    | 2015  | 822   | 480   | -         | -     | -    | -    | 1103065   | 1734   | 761   | 371   | -         | -     | -    | -    | 2656966   | 2524  | 1083  | 519   |
|                   | High   | 75478     | 95    | 38    | 20    | -         | -     | -    | -    | 161961    | 109    | 39    | 23    | -         | -     | -    | -    | 626690    | 242   | 82    | 49    |
| Switzerland       | Low    | 3085532   | 11613 | 4816  | 2402  | 2718748   | 9602  | 4108 | 2041 | 2473331   | 6043   | 2373  | 1294  | 2137069   | 4500  | 1637 | 994  | 1643671   | 2944  | 988   | 617   |
|                   | Middle | 3788293   | 4799  | 1935  | 1068  | 3893896   | 4746  | 1931 | 1044 | 4229886   | 3407   | 1254  | 812   | 4270400   | 3145  | 1107 | 776  | 3832595   | 2485  | 788   | 629   |
|                   | High   | 505370    | 374   | 143   | 75    | 539677    | 379   | 147  | 95   | 889556    | 382    | 155   | 76    | 934549    | 414   | 132  | 97   | 884081    | 367   | 99    | 112   |
| Spain, Barcelona  | Low    | 1779565   | 4066  | 1211  | 1278  | 1584656   | 3384  | 1058 | 998  | 1439528   | 2655   | 723   | 739   | 1030970   | 1549  | 355  | 432  | 699172    | 859   | 213   | 228   |
|                   | Middle | 264286    | 216   | 57    | 70    | 323188    | 230   | 65   | 74   | 446065    | 254    | 66    | 77    | 407831    | 204   | 37   | 63   | 332507    | 155   | 27    | 46    |
|                   | High   | 272812    | 145   | 39    | 57    | 342951    | 156   | 40   | 53   | 449393    | 183    | 46    | 62    | 442556    | 109   | 20   | 31   | 396912    | 104   | 25    | 28    |
| Italy, Turin      | Low    | 1050277   | 3088  | 876   | 1022  | 898806    | 2579  | 752  | 805  | 848741    | 2033   | 590   | 617   | 692559    | 1474  | 410  | 470  | 308043    | 579   | 168   | 160   |
|                   | Middle | 215215    | 229   | 73    | 80    | 213982    | 238   | 58   | 72   | 312374    | 251    | 58    | 81    | 298719    | 194   | 62   | 60   | 193946    | 111   | 28    | 29    |
|                   | High   | 84653     | 67    | 20    | 24    | 84047     | 76    | 19   | 28   | 149738    | 118    | 33    | 37    | 146760    | 77    | 19   | 24   | 99599     | 23    | 4     | 9     |
| Italy, Emilia     | Low    | -         | -     | -     | -     | -         | -     | -    | -    | 581285    | 1411   | 493   | 367   | 459536    | 1005  | 327  | 281  | 439321    | 639   | 186   | 179   |
|                   | Middle | -         | -     | -     | -     | -         | -     | -    | -    | 278674    | 202    | 70    | 47    | 269081    | 153   | 53   | 42   | 394079    | 176   | 59    | 38    |
|                   | High   | -         | -     | -     | -     | -         | -     | -    | -    | 157927    | 80     | 26    | 24    | 156742    | 67    | 18   | 27   | 256307    | 65    | 16    | 16    |
| Hungary           | Low    | 8366860   | 76388 | 27118 | 24077 | -         | -     | -    | -    | 7303436   | 66280  | 27954 | 19740 | -         | -     | -    | -    | 4506591   | 29068 | 14333 | 6656  |
|                   | Middle | 1900364   | 4339  | 1789  | 1237  | -         | -     | -    | -    | 2937424   | 5522   | 2401  | 1635  | -         | -     | -    | -    | 2802474   | 5174  | 2524  | 1126  |
|                   | High   | 834204    | 1342  | 563   | 375   | -         | -     | -    | -    | 1244456   | 1632   | 700   | 473   | -         | -     | -    | -    | 1575303   | 1804  | 870   | 379   |
| Poland            | Low    | -         | -     | -     | -     | -         | -     | -    | -    | 15703887  | 105363 | 30832 | 31472 | -         | -     | -    | -    | 13495695  | 67796 | 17424 | 17374 |
|                   | Middle | -         | -     | -     | -     | -         | -     | -    | -    | 10485912  | 17538  | 5455  | 5317  | -         | -     | -    | -    | 11313549  | 19977 | 5115  | 5174  |
|                   | High   | -         | -     | -     | -     | -         | -     | -    | -    | 3088419   | 2755   | 864   | 871   | -         | -     | -    | -    | 5109495   | 3750  | 927   | 1001  |
| Estonia           | Low    | -         | -     | -     | -     | -         | -     | -    | -    | 583644    | 8703   | 4576  | 2756  | 420061    | 5700  | 2617 | 1186 | 220858    | 2258  | 787   | 341   |
|                   | Middle | -         | -     | -     | -     | -         | -     | -    | -    | 1256349   | 4014   | 1930  | 1300  | 1266629   | 3852  | 1537 | 886  | 872204    | 2404  | 808   | 376   |
|                   | High   | -         | -     | -     | -     | -         | -     | -    | -    | 415318    | 834    | 385   | 297   | 424250    | 902   | 365  | 233  | 428881    | 586   | 184   | 99    |
| Lithuania         | Low    | -         | -     | -     | -     | -         | -     | -    | -    | 1308298   | 17533  | 10031 | 5039  | 843691    | 13062 | 7405 | 3916 | 609265    | 8281  | 4948  | 2465  |
|                   | Middle | -         | -     | -     | -     | -         | -     | -    | -    | 2473355   | 5782   | 2942  | 1684  | 2170089   | 5954  | 2969 | 1750 | 2054878   | 5493  | 2940  | 1611  |
|                   | High   | -         | -     | -     | -     | -         | -     | -    | -    | 822697    | 1223   | 630   | 385   | 714156    | 1242  | 600  | 417  | 834099    | 1299  | 644   | 413   |

Supplementary Table S 5. Distribution of person-years (py) and cardiovascular disease (CVD), ischaemic heart disease (IHD) and cerebrovascular disease (CeVD) deaths by occupational class, period and population, men, 35-64 years

|                   |                            | 1990-1994     |        |      |      | 1995-1999 |      |      |      | 2000-2004 |        |      |      | 2005-2009 |       |      |      | 2010-2014 |        |      |      |
|-------------------|----------------------------|---------------|--------|------|------|-----------|------|------|------|-----------|--------|------|------|-----------|-------|------|------|-----------|--------|------|------|
|                   |                            | py            | CVD    | IHD  | CeVD | py        | CVD  | IHD  | CeVD | py        | CVD    | IHD  | CeVD | py        | CVD   | IHD  | CeVD | py        | CVD    | IHD  | CeVD |
| Finland           | Unknown or non-active      | 67118         | 276    | 173  | 42   | 73234     | 225  | 126  | 31   | 163572    | 349    | 203  | 51   | 178173    | 427   | 235  | 51   | 182988    | 382    | 183  | 48   |
|                   | Upper non-manual employees | 818206        | 1065   | 681  | 183  | 819347    | 927  | 593  | 140  | 963414    | 951    | 560  | 169  | 915425    | 900   | 500  | 125  | 881923    | 613    | 324  | 86   |
|                   | Lower non-manual employees | 871411        | 1736   | 1183 | 260  | 857153    | 1533 | 995  | 257  | 1037367   | 1581   | 968  | 264  | 984132    | 1441  | 850  | 202  | 854376    | 972    | 540  | 134  |
|                   | Manual workers             | 2337156       | 7860   | 5291 | 1176 | 2203328   | 6551 | 4286 | 969  | 2469452   | 6190   | 3809 | 922  | 2282737   | 5894  | 3389 | 844  | 1791172   | 3994   | 2267 | 521  |
|                   | Farmers                    | 434793        | 1516   | 1058 | 203  | 359686    | 1068 | 701  | 182  | 311789    | 683    | 415  | 104  | 260977    | 599   | 355  | 97   | 159643    | 320    | 186  | 49   |
|                   | Self-employed              | 477030        | 1048   | 677  | 172  | 450455    | 928  | 615  | 157  | 540128    | 922    | 553  | 152  | 487100    | 873   | 503  | 126  | 470016    | 600    | 305  | 96   |
| Denmark           | Unknown or non-active      | -             | -      | -    | -    | 1171109   | 4739 | 2651 | 848  | 1134691   | 4224   | 1988 | 880  | 1843198   | 4003  | 1672 | 867  | 1245851   | 2882   | 1186 | 590  |
|                   | Upper non-manual employees | -             | -      | -    | -    | 1388194   | 924  | 533  | 145  | 1446156   | 783    | 342  | 161  | 1531015   | 673   | 305  | 120  | 1698366   | 509    | 215  | 88   |
|                   | Lower non-manual employees | -             | -      | -    | -    | 402844    | 322  | 173  | 50   | 349068    | 275    | 136  | 45   | 366099    | 195   | 94   | 42   | 541307    | 262    | 126  | 43   |
|                   | Manual workers             | -             | -      | -    | -    | 1657351   | 1506 | 920  | 249  | 2093402   | 1642   | 794  | 316  | 1458141   | 978   | 465  | 192  | 1777331   | 864    | 433  | 157  |
|                   | Farmers                    | -             | -      | -    | -    | 59444     | 46   | 33   | 4    | 35734     | 19     | 12   | 5    | 22426     | 14    | 9    | 1    | 24185     | 13     | 4    | 5    |
|                   | Self-employed              | -             | -      | -    | -    | 504859    | 504  | 307  | 82   | 503164    | 400    | 196  | 75   | 505950    | 265   | 120  | 51   | 387800    | 145    | 68   | 22   |
| England and Wales | Unknown or non-active      | 15011         | 67     | 48   | 10   | 14779     | 60   | 47   | 4    | 17999     | 54     | 34   | 11   | 17650     | 34    | 21   | 8    | 15166     | 38     | 23   | 6    |
|                   | Upper non-manual employees | 32974         | 54     | 39   | 5    | 32857     | 40   | 27   | 6    | 206068    | 190    | 129  | 25   | 198874    | 162   | 114  | 16   | 118742    | 68     | 50   | 7    |
|                   | Lower non-manual employees | 188588        | 327    | 228  | 44   | 183911    | 279  | 209  | 29   | 26556     | 28     | 19   | 1    | 25964     | 31    | 25   | 4    | 19769     | 18     | 10   | 3    |
|                   | Manual workers             | 250154        | 717    | 554  | 83   | 237523    | 567  | 420  | 72   | 197047    | 374    | 265  | 43   | 181142    | 293   | 199  | 32   | 106762    | 118    | 70   | 16   |
|                   |                            | Self-employed | -      | -    | -    | -         | -    | -    | -    | -         | 80784  | 115  | 71   | 19        | 71784 | 95   | 56   | 17        | 52880  | 35   | 26   |
| Austria           | Unknown or non-active      | 266856        | 2032   | 1144 | 317  | -         | -    | -    | -    | 319628    | 1495   | 844  | 210  | -         | -     | -    | -    | 658446    | 1695   | 981  | 212  |
|                   | Non-manual employees       | 513745        | 484    | 327  | 53   | -         | -    | -    | -    | 640981    | 439    | 263  | 57   | -         | -     | -    | -    | 1360954   | 584    | 363  | 68   |
|                   | Manual workers             | 441718        | 516    | 302  | 84   | -         | -    | -    | -    | 497158    | 428    | 272  | 56   | -         | -     | -    | -    | 1052391   | 623    | 389  | 81   |
|                   | Farmers                    | 59822         | 61     | 37   | 8    | -         | -    | -    | -    | 43542     | 29     | 16   | 3    | -         | -     | -    | -    | -         | -      | -    | -    |
|                   |                            | Self-employed | 111642 | 161  | 88   | 32        | -    | -    | -    | -         | 144635 | 111  | 74   | 13        | -     | -    | -    | -         | 442759 | 194  | 126  |
| Switzerland       | Unknown or non-active      | 303089        | 1640   | 833  | 187  | 225461    | 722  | 364  | 102  | 1249757   | 2510   | 1280 | 283  | 1020064   | 1753  | 897  | 184  | 951142    | 1115   | 498  | 124  |
|                   | Upper non-manual employees | 2250925       | 2117   | 1299 | 174  | 2189646   | 2092 | 1249 | 187  | 2146281   | 1130   | 644  | 88   | 2089066   | 1169  | 670  | 99   | 1687463   | 819    | 436  | 60   |
|                   | Lower non-manual employees | 537592        | 769    | 439  | 72   | 532902    | 714  | 409  | 78   | 554922    | 393    | 224  | 37   | 551209    | 405   | 219  | 35   | 531156    | 334    | 167  | 37   |
|                   | Manual workers             | 942746        | 1744   | 971  | 154  | 885491    | 1492 | 835  | 165  | 754420    | 729    | 384  | 78   | 726046    | 759   | 410  | 77   | 709737    | 606    | 312  | 47   |
|                   | Farmers                    | 279351        | 361    | 185  | 30   | 249301    | 346  | 171  | 29   | 214443    | 137    | 75   | 15   | 198844    | 155   | 84   | 15   | 157153    | 140    | 75   | 9    |
|                   | Self-employed              | 598998        | 790    | 478  | 57   | 556906    | 760  | 429  | 77   | 629855    | 529    | 273  | 61   | 573368    | 519   | 315  | 46   | 420364    | 348    | 184  | 31   |
| Italy, Turin      | Unknown or non-active      | 40346         | 212    | 100  | 38   | 25143     | 91   | 33   | 19   | 63371     | 118    | 46   | 25   | 50913     | 98    | 52   | 14   | -         | -      | -    | -    |
|                   | Upper non-manual employees | 151271        | 152    | 76   | 32   | 127060    | 113  | 61   | 19   | 179806    | 112    | 49   | 17   | 148649    | 99    | 53   | 18   | -         | -      | -    | -    |
|                   | Lower non-manual employees | 175698        | 258    | 118  | 50   | 153005    | 146  | 79   | 11   | 155892    | 136    | 78   | 17   | 129946    | 93    | 50   | 19   | -         | -      | -    | -    |
|                   | Manual workers             | 394565        | 705    | 330  | 145  | 308654    | 529  | 262  | 83   | 296461    | 332    | 162  | 52   | 236168    | 210   | 107  | 32   | -         | -      | -    | -    |
|                   | Farmers                    | -             | -      | -    | -    | -         | -    | -    | -    | 2063      | 5      | 2    | 1    | 1539      | 5     | 2    | 0    | -         | -      | -    | -    |
|                   | Self-employed              | 149486        | 231    | 125  | 39   | 119039    | 184  | 93   | 28   | 135225    | 131    | 61   | 18   | 104603    | 97    | 49   | 12   | -         | -      | -    | -    |
| Estonia           | Unknown or non-active      | -             | -      | -    | -    | -         | -    | -    | -    | 414812    | 4430   | 2327 | 910  | 313183    | 2651  | 1200 | 369  | 299087    | 1967   | 812  | 233  |
|                   | Upper non-manual employees | -             | -      | -    | -    | -         | -    | -    | -    | 326235    | 514    | 304  | 95   | 321468    | 574   | 280  | 65   | 270562    | 205    | 96   | 25   |
|                   | Lower non-manual employees | -             | -      | -    | -    | -         | -    | -    | -    | 60421     | 105    | 56   | 22   | 62718     | 168   | 78   | 25   | 55214     | 72     | 32   | 2    |
|                   | Manual workers             | -             | -      | -    | -    | -         | -    | -    | -    | 443517    | 1112   | 612  | 192  | 414476    | 1402  | 648  | 181  | 294485    | 454    | 221  | 31   |
|                   | Farmers                    | -             | -      | -    | -    | -         | -    | -    | -    | 118742    | 435    | 250  | 80   | 102732    | 418   | 210  | 56   | 52955     | 102    | 42   | 11   |
| Lithuania         | Unknown or non-active      | -             | -      | -    | -    | -         | -    | -    | -    | 1166076   | 9420   | 5567 | 1495 | 828388    | 7383  | 4185 | 1089 | 812390    | 7186   | 4210 | 1201 |
|                   | Upper non-manual employees | -             | -      | -    | -    | -         | -    | -    | -    | 399957    | 569    | 356  | 78   | 339200    | 658   | 367  | 108  | 406916    | 496    | 307  | 70   |
|                   | Lower non-manual employees | -             | -      | -    | -    | -         | -    | -    | -    | 106521    | 160    | 94   | 27   | 101953    | 178   | 103  | 35   | 120415    | 180    | 112  | 26   |
|                   | Manual workers             | -             | -      | -    | -    | -         | -    | -    | -    | 869923    | 1979   | 1230 | 317  | 722667    | 2361  | 1351 | 387  | 661281    | 1232   | 726  | 199  |
|                   | Farmers                    | -             | -      | -    | -    | -         | -    | -    | -    | 92640     | 351    | 223  | 52   | 73837     | 352   | 202  | 51   | 28288     | 63     | 41   | 8    |
|                   | Self-employed              | -             | -      | -    | -    | -         | -    | -    | -    | 317143    | 870    | 522  | 116  | 266082    | 967   | 543  | 145  | 177679    | 248    | 151  | 40   |

Supplementary Table S 6. Population-Attributable Risk (PAR, per 100,000 person-year), Population-Attributable Fraction (PAF, %), Relative Index of Inequality (RII), Slope Index of Inequality (SII) with 95% confidence intervals (CI) of education for cardiovascular disease mortality between beginning of observation periods and 2010-14.

|                          | PAR (100000pyrs)    |                     | PAF (%)          |                  | SII (95% CI)           |                       | RII (95% CI)     |                  |
|--------------------------|---------------------|---------------------|------------------|------------------|------------------------|-----------------------|------------------|------------------|
|                          | 1990-94*            | 2010-2014           | 1990-94*         | 2010-2014        | 1990-94*               | 2010-2014             | 1990-94*         | 2010-2014        |
| <b>Men</b>               |                     |                     |                  |                  |                        |                       |                  |                  |
| <b>Finland</b>           | 281.4 (270.5-292.0) | 156.3 (153.5-159.3) | 30.8 (29.4-32.3) | 39.7 (38.5-40.9) | 543.3 (506.1-580.4)    | 373.2 (355.2-391.2)   | 2.10 (2.00-2.20) | 2.77 (2.63-2.92) |
| <b>Denmark</b>           | 198.3 (188.4-208.1) | 88.0 (85.4-90.7)    | 32.9 (30.9-34.8) | 35.4 (33.9-37.0) | 297.9 (268.7-327.0)    | 215.2 (201.3-229.1)   | 1.86 (1.77-1.95) | 2.60 (2.44-2.76) |
| <b>England and Wales</b> | 241.3 (210.2-272.5) | 64.6 (53.9-75.6)    | 30.2 (25.5-34.7) | 26.1 (20.3-31.6) | 546.5 (412.1-681.0)    | 199.8 (126.6-273.1)   | 2.40 (2.00-3.00) | 2.40 (1.70-3.40) |
| <b>Austria</b>           | 269.8 (241.9-299.7) | 107.6 (103.1-112.4) | 33.8 (29.7-38.0) | 35.2 (33.2-37.3) | 297.9 (237.3-358.4)    | 225.6 (204.9-246.3)   | 1.45 (1.34-1.56) | 2.08 (1.94-2.24) |
| <b>Switzerland</b>       | 140.9 (135.5-146.8) | 67.7 (65.9-69.5)    | 26.3 (25.0-27.6) | 32.6 (31.3-34.0) | 322.7 (300.5-344.9)    | 186.6 (173.2-200.0)   | 1.89 (1.80-1.97) | 2.79 (2.59-2.99) |
| <b>Spain (Barcelona)</b> | 96.4 (84.3-109.8)   | 60.0 (53.6-66.4)    | 22.7 (19.3-26.2) | 29.7 (25.3-33.7) | 104.9 (63.7-146.2)     | 107.8 (77.5-138.2)    | 1.35 (1.21-1.50) | 1.82 (1.53-2.16) |
| <b>Italy (Turin)</b>     | 104.5 (79.1-129.9)  | 39.6 (22.5-57.1)    | 19.2 (13.9-24.2) | 18.8 (9.4-27.4)  | 145.1 (76.0-214.2)     | 68.6 (20.7-116.4)     | 1.37 (1.20-1.57) | 1.38 (1.08-1.76) |
| <b>Italy (Emilia)</b>    | 61.5 (46.8-77.7)    | 41.7 (34.5-49.7)    | 20.3 (14.7-26.0) | 28.3 (22.1-34.7) | 120.3 (74.1-166.5)     | 99.9 (72.2-127.6)     | 1.60 (1.30-1.90) | 2.10 (1.70-2.60) |
| <b>Hungary</b>           | 524.6 (512.4-537.4) | 407.0 (402.5-411.2) | 37.1 (36.0-38.2) | 50.0 (49.1-51.0) | 839.5 (798.2-880.9)    | 1005.0 (980.1-1029.9) | 2.13 (2.06-2.20) | 4.64 (4.45-4.84) |
| <b>Poland</b>            | 466.1 (461.6-470.6) | 372.6 (369.9-375.5) | 50.9 (50.2-51.7) | 52.0 (51.5-52.7) | 1013.3 (997.5-1029.2)  | 831.2 (822.1-840.2)   | 3.84 (3.76-3.93) | 3.98 (3.92-4.05) |
| <b>Estonia</b>           | 508.6 (492.2-526.2) | 338.3 (329.3-347.7) | 40.6 (38.7-42.5) | 43.7 (41.6-45.7) | 1062.0 (1000.2-1123.9) | 796.9 (741.6-852.3)   | 2.60 (2.46-2.76) | 3.01 (2.77-3.27) |
| <b>Lithuania</b>         | 496.8 (483.8-508.9) | 462.9 (455.2-470.6) | 42.4 (40.9-43.8) | 45.7 (44.5-46.9) | 840.5 (798.5-882.6)    | 876.1 (835.2-917.0)   | 2.27 (2.17-2.37) | 2.69 (2.56-2.83) |
| <b>Women</b>             |                     |                     |                  |                  |                        |                       |                  |                  |
| <b>Finland</b>           | 157.4 (149.5-166.1) | 57.0 (54.9-59.2)    | 39.4 (37.0-41.9) | 39.4 (37.3-41.6) | 291.0 (269.2-312.8)    | 143.3 (132.5-154.2)   | 2.42 (2.25-2.60) | 3.20 (2.92-3.51) |
| <b>Denmark</b>           | 127.4 (119.4-136.2) | 48.0 (46.0-50.2)    | 42.9 (39.7-46.3) | 38.4 (36.1-40.8) | 225.6 (205.4-245.8)    | 127.7 (118.5-137.0)   | 2.88 (2.65-3.14) | 3.59 (3.28-3.93) |
| <b>England and Wales</b> | 130.1 (101.4-162.5) | 46.0 (37.2-56.0)    | 32.0 (23.7-40.6) | 34.7 (25.2-43.8) | 276.2 (167.6-384.8)    | 123.2 (71.2-175.2)    | 2.70 (1.80-3.90) | 3.10 (1.80-5.30) |
| <b>Austria</b>           | 154.5 (117.5-198.1) | 56.1 (48.1-63.9)    | 36.0 (26.6-46.5) | 37.4 (31.2-43.2) | 249.7 (212.1-287.2)    | 105.2 (90.9-119.4)    | 1.87 (1.69-2.07) | 2.14 (1.93-2.37) |
| <b>Switzerland</b>       | 84.7 (75.3-94.9)    | 32.3 (29.0-36.0)    | 37.1 (32.5-42.0) | 35.2 (30.7-39.9) | 170.4 (157.1-183.7)    | 73.7 (65.3-82.2)      | 2.27 (2.12-2.42) | 2.57 (2.31-2.85) |
| <b>Spain (Barcelona)</b> | 87.7 (78.2-97.9)    | 20.2 (14.4-26.9)    | 46.5 (40.2-52.8) | 25.7 (16.8-34.8) | 131.1 (103.8-158.4)    | 35.9 (16.4-55.5)      | 2.36 (1.89-2.94) | 1.75 (1.31-2.35) |
| <b>Italy (Turin)</b>     | 83.6 (56.5-114.2)   | 42.6 (28.2-59.5)    | 32.7 (21.1-45.1) | 42.7 (25.3-61.2) | 140.9 (90.4-191.5)     | 73.7 (41.3-106.1)     | 2.00 (1.57-2.56) | 2.32 (1.54-3.50) |
| <b>Italy (Emilia)</b>    | 29.0 (15.2-42.6)    | 17.5 (10.0-25.0)    | 22.1 (10.5-32.7) | 25.2 (12.5-36.6) | 49.6 (19.1-80.2)       | 34.4 (15.2-53.6)      | 1.50 (1.20-2.00) | 1.70 (1.30-2.40) |
| <b>Hungary</b>           | 373.1 (357.0-388.7) | 179.2 (173.7-186.0) | 46.3 (44.0-48.5) | 44.5 (42.8-46.3) | 470.1 (433.4-506.8)    | 448.1 (432.4-463.8)   | 2.21 (2.09-2.34) | 4.54 (4.30-4.80) |
| <b>Poland</b>            | 238.1 (232.6-243.5) | 173.0 (170.5-175.4) | 52.2 (50.7-53.6) | 53.9 (52.8-54.9) | 479.7 (469.5-489.9)    | 382.0 (376.7-387.2)   | 3.75 (3.63-3.87) | 4.26 (4.17-4.36) |
| <b>Estonia</b>           | 249.4 (238.4-261.4) | 129.8 (125.0-135.2) | 44.2 (41.6-46.9) | 42.6 (40.0-45.3) | 546.2 (514.0-578.3)    | 342.1 (314.3-370.0)   | 3.17 (2.94-3.41) | 3.62 (3.23-4.04) |
| <b>Lithuania</b>         | 255.2 (246.6-264.1) | 199.6 (195.1-204.2) | 47.2 (45.2-49.3) | 48.4 (46.7-50.2) | 434.5 (410.7-458.2)    | 413.8 (392.9-434.8)   | 2.66 (2.51-2.82) | 3.46 (3.23-3.70) |

\* 1995-99 for Denmark, 2000-04 for Italy (Emilia), Poland, Estonia and Lithuania

Supplementary Table S 7. Age-standardised cardiovascular disease mortality rates per 100,000 person years, by occupational class, period and population, men, 35-64 years

|                   |                            | 1990-1994 |        |         | 1995-1999 |        |         | 2000-2004 |        |         | 2005-2009 |        |         | 2010-2014 |        |         |
|-------------------|----------------------------|-----------|--------|---------|-----------|--------|---------|-----------|--------|---------|-----------|--------|---------|-----------|--------|---------|
|                   |                            | ASMR      | 95% CI |         | ASMR      | 95% CI |         | ASMR      | 95% CI |         | ASMR      | 95% CI |         | ASMR      | 95% CI |         |
| Finland           | Upper non-manual employees | 179.0     | 167.8  | - 190.1 | 126.0     | 117.6  | - 134.3 | 106.1     | 99.3   | - 112.9 | 87.5      | 81.8   | - 93.3  | 69.7      | 64.2   | - 75.2  |
|                   | Lower non-manual employees | 249.5     | 237.6  | - 261.5 | 188.1     | 178.5  | - 197.7 | 164.4     | 156.2  | - 172.5 | 133.9     | 127.0  | - 140.9 | 112.6     | 105.6  | - 119.7 |
|                   | Manual workers             | 388.0     | 379.4  | - 396.7 | 312.3     | 304.6  | - 319.9 | 263.1     | 256.5  | - 269.7 | 230.0     | 224.1  | - 235.9 | 192.8     | 186.8  | - 198.8 |
|                   | Farmers                    | 297.3     | 282.1  | - 312.5 | 252.3     | 236.8  | - 267.8 | 190.3     | 175.9  | - 204.7 | 177.5     | 162.0  | - 193.0 | 143.9     | 127.4  | - 160.4 |
|                   | Self-employed              | 262.9     | 246.6  | - 279.1 | 205.4     | 191.8  | - 218.9 | 169.6     | 158.5  | - 180.8 | 144.2     | 134.0  | - 154.3 | 109.7     | 100.9  | - 118.6 |
| Denmark*          | Upper non-manual employees | -         | -      | -       | 116.7     | 108.7  | - 124.7 | 91.4      | 84.7   | - 98.1  | 70.3      | 65.0   | - 75.7  | 49.6      | 45.3   | - 53.9  |
|                   | Lower non-manual employees | -         | -      | -       | 163.5     | 144.5  | - 182.6 | 168.9     | 147.8  | - 190.0 | 105.9     | 90.8   | - 120.9 | 84.9      | 74.6   | - 95.2  |
|                   | Manual workers             | -         | -      | -       | 210.4     | 199.0  | - 221.8 | 160.5     | 152.5  | - 168.6 | 147.8     | 138.4  | - 157.1 | 108.7     | 101.4  | - 116.0 |
|                   | Farmers                    | -         | -      | -       | 168.1     | 117.8  | - 218.3 | 162.5     | 87.9   | - 237.2 | 221.0     | 100.5  | - 341.4 | 163.9     | 74.4   | - 253.5 |
|                   | Self-employed              | -         | -      | -       | 105.5     | 96.2   | - 114.8 | 80.9      | 73.0   | - 88.9  | 51.7      | 45.5   | - 58.0  | 38.1      | 31.9   | - 44.4  |
| England and Wales | Upper non-manual employees | 199.3     | 146.0  | - 252.7 | 136.4     | 93.8   | - 178.9 | 102.4     | 87.6   | - 117.1 | 77.5      | 65.4   | - 89.5  | 59.6      | 45.4   | - 73.8  |
|                   | Lower non-manual employees | 196.4     | 175.1  | - 217.8 | 156.5     | 138.0  | - 175.0 | 114.3     | 71.7   | - 156.9 | 117.9     | 76.4   | - 159.4 | 90.4      | 48.6   | - 132.1 |
|                   | Manual workers             | 290.9     | 269.7  | - 312.2 | 231.1     | 212.1  | - 250.1 | 191.0     | 171.7  | - 210.4 | 153.2     | 135.6  | - 170.8 | 103.6     | 84.8   | - 122.4 |
|                   | Farmers                    | -         | -      | -       | -         | -      | -       | 138.1     | 112.8  | - 163.4 | 111.8     | 89.2   | - 134.3 | 61.6      | 41.2   | - 82.0  |
|                   | Self-employed              | -         | -      | -       | -         | -      | -       | -         | -      | -       | -         | -      | -       | -         | -      | -       |
| Austria           | Non-manual employees       | 119.3     | 104.0  | - 134.6 | -         | -      | -       | 82.7      | 72.6   | - 92.8  | -         | -      | -       | 53.5      | 48.6   | - 58.4  |
|                   | Manual workers             | 151.2     | 128.5  | - 173.9 | -         | -      | -       | 112.5     | 95.3   | - 129.6 | -         | -      | -       | 73.0      | 66.4   | - 79.5  |
|                   | Farmers†                   | 111.3     | 75.9   | - 146.6 | -         | -      | -       | 90.5      | 47.5   | - 133.5 | -         | -      | -       | -         | -      | -       |
|                   | Farmers††                  | -         | -      | -       | -         | -      | -       | -         | -      | -       | -         | -      | -       | -         | -      | -       |
|                   | Self-employed              | 163.2     | 134.5  | - 191.9 | -         | -      | -       | 91.7      | 72.3   | - 111.1 | -         | -      | -       | 50.6      | 42.9   | - 58.4  |
| Switzerland*      | Upper non-manual employees | 121.7     | 116.5  | - 127.0 | 102.1     | 97.7   | - 106.6 | 74.0      | 69.6   | - 78.4  | 62.1      | 58.5   | - 65.7  | 50.6      | 47.1   | - 54.1  |
|                   | Lower non-manual employees | 205.0     | 190.5  | - 219.6 | 164.9     | 152.7  | - 177.0 | 117.1     | 105.3  | - 128.9 | 97.6      | 88.0   | - 107.1 | 87.2      | 77.8   | - 96.6  |
|                   | Manual workers             | 233.1     | 222.2  | - 244.1 | 189.3     | 179.7  | - 198.9 | 154.4     | 143.1  | - 165.7 | 136.5     | 126.7  | - 146.3 | 114.1     | 105.0  | - 123.2 |
|                   | Farmers                    | 128.8     | 115.5  | - 142.2 | 131.0     | 117.1  | - 144.9 | 78.6      | 65.4   | - 91.7  | 81.7      | 68.6   | - 94.8  | 87.5      | 72.7   | - 102.3 |
|                   | Self-employed              | 146.4     | 136.1  | - 156.7 | 127.7     | 118.5  | - 136.8 | 88.7      | 81.1   | - 96.3  | 78.7      | 71.9   | - 85.6  | 64.4      | 57.5   | - 71.3  |
| Italy (Turin)     | Upper non-manual employees | 105.0     | 87.8   | - 122.2 | 73.3      | 59.5   | - 87.1  | 61.5      | 49.9   | - 73.1  | 56.6      | 45.2   | - 67.9  | -         | -      | -       |
|                   | Lower non-manual employees | 159.2     | 139.4  | - 179.0 | 91.6      | 76.5   | - 106.7 | 85.8      | 71.1   | - 100.5 | 63.4      | 50.1   | - 76.6  | -         | -      | -       |
|                   | Manual workers             | 152.0     | 140.5  | - 163.5 | 133.3     | 121.3  | - 145.3 | 103.0     | 91.6   | - 114.4 | 77.7      | 66.9   | - 88.6  | -         | -      | -       |
|                   | Farmers††                  | -         | -      | -       | -         | -      | -       | 242.9     | 29.5   | - 456.4 | 302.1     | 38.4   | - 565.9 | -         | -      | -       |
|                   | Self-employed              | 143.7     | 124.9  | - 162.6 | 124.4     | 105.7  | - 143.0 | 89.5      | 73.8   | - 105.2 | 79.6      | 63.2   | - 96.1  | -         | -      | -       |
| Estonia*          | Upper non-manual employees | -         | -      | -       | -         | -      | -       | 294.8     | 268.8  | - 320.8 | 229.4     | 210.3  | - 248.6 | 149.0     | 128.2  | - 169.8 |
|                   | Lower non-manual employees | -         | -      | -       | -         | -      | -       | 450.9     | 360.8  | - 541.1 | 469.5     | 396.4  | - 542.6 | 287.4     | 220.0  | - 354.7 |
|                   | Manual workers             | -         | -      | -       | -         | -      | -       | 581.7     | 547.0  | - 616.5 | 503.2     | 476.1  | - 530.3 | 354.5     | 321.5  | - 387.4 |
|                   | Farmers                    | -         | -      | -       | -         | -      | -       | 424.1     | 384.4  | - 463.9 | 384.5     | 347.4  | - 421.5 | 208.8     | 168.2  | - 249.3 |
|                   | Self-employed              | -         | -      | -       | -         | -      | -       | -         | -      | -       | -         | -      | -       | -         | -      | -       |
| Lithuania*        | Upper non-manual employees | -         | -      | -       | -         | -      | -       | 278.5     | 255.1  | - 302.0 | 314.9     | 290.4  | - 339.3 | 271.4     | 247.0  | - 295.8 |
|                   | Lower non-manual employees | -         | -      | -       | -         | -      | -       | 400.3     | 333.4  | - 467.1 | 409.5     | 345.6  | - 473.4 | 389.4     | 329.2  | - 449.5 |
|                   | Manual workers             | -         | -      | -       | -         | -      | -       | 543.9     | 519.3  | - 568.5 | 634.1     | 608.2  | - 659.9 | 547.5     | 515.9  | - 579.0 |
|                   | Farmers                    | -         | -      | -       | -         | -      | -       | 517.5     | 462.9  | - 572.1 | 570.2     | 510.4  | - 629.9 | 325.7     | 242.1  | - 409.4 |
|                   | Self-employed              | -         | -      | -       | -         | -      | -       | 432.0     | 401.9  | - 462.1 | 489.4     | 457.8  | - 521.1 | 218.0     | 189.2  | - 246.7 |

\* ASMRs are corrected for the exclusion of economically inactive



Supplementary Table S 8. Age-standardised ischaemic heart disease mortality rates per 100,000 person years, by occupational class, period and population, men, 35-64 years

|                   |                            | 1990-1994 |        |         | 1995-1999 |        |         | 2000-2004 |        |         | 2005-2009 |        |         | 2010-2014 |        |         |
|-------------------|----------------------------|-----------|--------|---------|-----------|--------|---------|-----------|--------|---------|-----------|--------|---------|-----------|--------|---------|
|                   |                            | ASMR      | 95% CI |         | ASMR      | 95% CI |         | ASMR      | 95% CI |         | ASMR      | 95% CI |         | ASMR      | 95% CI |         |
| Finland           | Upper non-manual employees | 117.1     | 108.0  | - 126.2 | 81.6      | 74.8   | - 88.3  | 63.1      | 57.9   | - 68.4  | 48.0      | 43.8   | - 52.3  | 36.8      | 32.8   | - 40.8  |
|                   | Lower non-manual employees | 172.9     | 162.9  | - 182.9 | 123.5     | 115.8  | - 131.3 | 100.9     | 94.5   | - 107.3 | 78.6      | 73.3   | - 83.9  | 62.4      | 57.2   | - 67.7  |
|                   | Manual workers             | 264.7     | 257.5  | - 271.8 | 206.4     | 200.2  | - 212.7 | 163.0     | 157.7  | - 168.2 | 130.9     | 126.4  | - 135.3 | 107.2     | 102.8  | - 111.7 |
|                   | Farmers                    | 204.2     | 191.8  | - 216.7 | 163.3     | 151.0  | - 175.7 | 113.9     | 102.9  | - 124.9 | 101.6     | 90.1   | - 113.0 | 80.7      | 68.5   | - 92.8  |
|                   | Self-employed              | 173.6     | 160.3  | - 187.0 | 136.8     | 125.7  | - 147.8 | 101.4     | 92.8   | - 110.0 | 80.0      | 72.8   | - 87.2  | 54.9      | 48.7   | - 61.1  |
| Denmark*          | Upper non-manual employees | -         | -      | -       | 66.5      | 60.5   | - 72.4  | 39.5      | 35.2   | - 43.9  | 30.0      | 26.6   | - 33.4  | 19.7      | 17.1   | - 22.3  |
|                   | Lower non-manual employees | -         | -      | -       | 84.7      | 71.2   | - 98.1  | 84.8      | 69.7   | - 99.9  | 47.2      | 37.5   | - 56.9  | 38.3      | 31.6   | - 45.0  |
|                   | Manual workers             | -         | -      | -       | 123.7     | 115.1  | - 132.2 | 76.7      | 71.2   | - 82.2  | 64.5      | 58.6   | - 70.4  | 49.8      | 45.1   | - 54.5  |
|                   | Farmers                    | -         | -      | -       | 113.8     | 73.7   | - 153.9 | 100.9     | 42.5   | - 159.2 | 129.1     | 41.7   | - 216.4 | 46.3      | 0.6    | - 92.0  |
|                   | Self-employed              | -         | -      | -       | 63.6      | 56.4   | - 70.8  | 39.5      | 33.9   | - 45.1  | 22.9      | 18.8   | - 27.0  | 17.8      | 13.6   | - 22.0  |
| England and Wales | Upper non-manual employees | 143.8     | 98.6   | - 189.1 | 90.4      | 56.1   | - 124.7 | 69.7      | 57.5   | - 81.8  | 54.5      | 44.4   | - 64.5  | 44.2      | 32.0   | - 56.5  |
|                   | Lower non-manual employees | 137.9     | 119.9  | - 155.9 | 117.6     | 101.5  | - 133.6 | 81.0      | 44.5   | - 117.6 | 94.6      | 57.5   | - 131.7 | 50.6      | 19.2   | - 81.9  |
|                   | Manual workers             | 224.7     | 206.0  | - 243.4 | 171.0     | 154.7  | - 187.4 | 135.4     | 119.1  | - 151.7 | 103.2     | 88.8   | - 117.5 | 61.1      | 46.7   | - 75.5  |
|                   | Farmers                    | -         | -      | -       | -         | -      | -       | 85.1      | 65.2   | - 104.9 | 66.6      | 49.1   | - 84.1  | 45.9      | 28.2   | - 63.5  |
|                   | Self-employed              | -         | -      | -       | -         | -      | -       | -         | -      | -       | -         | -      | -       | -         | -      | -       |
| Austria           | Non-manual employees       | 79.9      | 67.4   | - 92.4  | -         | -      | -       | 50.3      | 42.4   | - 58.2  | -         | -      | -       | 33.8      | 29.8   | - 37.7  |
|                   | Manual workers             | 91.2      | 73.1   | - 109.4 | -         | -      | -       | 69.4      | 56.4   | - 82.4  | -         | -      | -       | 45.8      | 40.6   | - 51.0  |
|                   | Farmers†                   | 66.5      | 39.2   | - 93.8  | -         | -      | -       | 58.2      | 21.4   | - 95.1  | -         | -      | -       | -         | -      | -       |
|                   | Farmers††                  | 84.3      | 64.5   | - 104.1 | -         | -      | -       | 63.7      | 47.0   | - 80.3  | -         | -      | -       | 32.7      | 26.5   | - 38.9  |
|                   | Self-employed              | -         | -      | -       | -         | -      | -       | -         | -      | -       | -         | -      | -       | -         | -      | -       |
| Switzerland*      | Upper non-manual employees | 73.0      | 69.0   | - 77.0  | 60.4      | 57.0   | - 63.8  | 41.4      | 38.1   | - 44.7  | 34.3      | 31.7   | - 36.9  | 25.7      | 23.3   | - 28.2  |
|                   | Lower non-manual employees | 112.2     | 101.6  | - 122.7 | 92.5      | 83.4   | - 101.5 | 63.6      | 55.1   | - 72.1  | 49.8      | 43.2   | - 56.5  | 41.2      | 34.9   | - 47.5  |
|                   | Manual workers             | 124.9     | 117.0  | - 132.8 | 103.1     | 96.1   | - 110.1 | 78.0      | 70.1   | - 85.9  | 69.8      | 63.1   | - 76.6  | 54.6      | 48.5   | - 60.6  |
|                   | Farmers                    | 64.6      | 55.2   | - 73.9  | 64.4      | 54.7   | - 74.1  | 42.4      | 32.8   | - 52.0  | 42.7      | 33.5   | - 52.0  | 45.2      | 34.7   | - 55.8  |
|                   | Self-employed              | 88.5      | 80.5   | - 96.5  | 71.8      | 65.0   | - 78.6  | 45.6      | 40.1   | - 51.0  | 46.9      | 41.7   | - 52.1  | 34.1      | 29.1   | - 39.1  |
| Italy (Turin)     | Upper non-manual employees | 52.5      | 40.3   | - 64.6  | 39.6      | 29.4   | - 49.7  | 26.7      | 19.1   | - 34.4  | 30.1      | 21.9   | - 38.4  | -         | -      | -       |
|                   | Lower non-manual employees | 72.8      | 59.4   | - 86.2  | 49.6      | 38.4   | - 60.8  | 49.4      | 38.2   | - 60.5  | 33.8      | 24.2   | - 43.3  | -         | -      | -       |
|                   | Manual workers             | 71.4      | 63.5   | - 79.3  | 65.0      | 56.7   | - 73.3  | 50.6      | 42.6   | - 58.6  | 39.5      | 31.8   | - 47.2  | -         | -      | -       |
|                   | Farmers††                  | -         | -      | -       | -         | -      | -       | 92.9      | 0.0    | - 221.7 | 121.2     | 0.0    | - 288.9 | -         | -      | -       |
|                   | Self-employed              | 77.9      | 64.0   | - 91.8  | 60.9      | 48.3   | - 73.5  | 41.8      | 31.1   | - 52.6  | 39.1      | 27.9   | - 50.3  | -         | -      | -       |
| Estonia*          | Upper non-manual employees | -         | -      | -       | -         | -      | -       | 168.4     | 149.1  | - 187.7 | 109.9     | 96.7   | - 123.1 | 67.1      | 53.4   | - 80.7  |
|                   | Lower non-manual employees | -         | -      | -       | -         | -      | -       | 228.5     | 165.7  | - 291.2 | 213.6     | 164.8  | - 262.5 | 122.5     | 79.5   | - 165.5 |
|                   | Manual workers             | -         | -      | -       | -         | -      | -       | 301.2     | 276.9  | - 325.4 | 225.1     | 207.3  | - 242.8 | 155.0     | 134.3  | - 175.6 |
|                   | Farmers                    | -         | -      | -       | -         | -      | -       | 239.5     | 209.8  | - 269.1 | 190.9     | 165.1  | - 216.7 | 82.7      | 57.7   | - 107.8 |
|                   | Self-employed              | -         | -      | -       | -         | -      | -       | -         | -      | -       | -         | -      | -       | -         | -      | -       |
| Lithuania*        | Upper non-manual employees | -         | -      | -       | -         | -      | -       | 170.9     | 152.7  | - 189.1 | 175.5     | 157.2  | - 193.8 | 166.4     | 147.4  | - 185.4 |
|                   | Lower non-manual employees | -         | -      | -       | -         | -      | -       | 234.0     | 183.3  | - 284.8 | 243.0     | 193.4  | - 292.6 | 234.5     | 188.8  | - 280.3 |
|                   | Manual workers             | -         | -      | -       | -         | -      | -       | 325.1     | 306.4  | - 343.7 | 364.1     | 344.5  | - 383.7 | 311.1     | 287.7  | - 334.4 |
|                   | Farmers                    | -         | -      | -       | -         | -      | -       | 329.8     | 286.1  | - 373.4 | 326.7     | 281.5  | - 371.9 | 214.4     | 146.1  | - 282.7 |
|                   | Self-employed              | -         | -      | -       | -         | -      | -       | 263.3     | 239.7  | - 287.0 | 280.7     | 256.5  | - 304.9 | 132.3     | 109.9  | - 154.7 |

\* ASMRs are corrected for the exclusion of economically inactive

Supplementary Table S 9. Age-standardised cerebrovascular disease mortality rates per 100,000 person years, by occupational class, period and population, men, 35-64 years

|                   |                            | 1990-1994 |        |        | 1995-1999 |        |        | 2000-2004 |        |         | 2005-2009 |        |         | 2010-2014 |        |         |
|-------------------|----------------------------|-----------|--------|--------|-----------|--------|--------|-----------|--------|---------|-----------|--------|---------|-----------|--------|---------|
|                   |                            | ASMR      | 95% CI |        | ASMR      | 95% CI |        | ASMR      | 95% CI |         | ASMR      | 95% CI |         | ASMR      | 95% CI |         |
| Finland           | Upper non-manual employees | 30.0      | 25.5   | - 34.6 | 18.9      | 15.7   | - 22.1 | 18.9      | 16.0   | - 21.7  | 12.2      | 10.0   | - 14.4  | 9.8       | 7.7    | - 11.8  |
|                   | Lower non-manual employees | 36.7      | 32.1   | - 41.2 | 30.7      | 26.9   | - 34.5 | 27.5      | 24.2   | - 30.9  | 18.8      | 16.2   | - 21.5  | 15.4      | 12.8   | - 18.0  |
|                   | Manual workers             | 56.8      | 53.5   | - 60.1 | 45.7      | 42.8   | - 48.6 | 39.0      | 36.5   | - 41.6  | 33.3      | 31.0   | - 35.6  | 25.3      | 23.1   | - 27.5  |
|                   | Farmers                    | 40.3      | 34.7   | - 46.0 | 44.1      | 37.5   | - 50.7 | 29.3      | 23.6   | - 35.0  | 27.8      | 22.2   | - 33.5  | 23.9      | 16.9   | - 30.9  |
|                   | Self-employed              | 41.0      | 34.7   | - 47.3 | 34.7      | 29.1   | - 40.3 | 28.3      | 23.7   | - 32.8  | 22.5      | 18.0   | - 27.0  | 17.3      | 13.8   | - 20.9  |
| Denmark*          | Upper non-manual employees | -         | -      | -      | 18.0      | 14.9   | - 21.1 | 19.6      | 16.4   | - 22.8  | 13.3      | 10.9   | - 15.7  | 9.3       | 7.3    | - 11.2  |
|                   | Lower non-manual employees | -         | -      | -      | 26.1      | 18.4   | - 33.9 | 28.1      | 19.4   | - 36.7  | 24.4      | 16.9   | - 31.9  | 15.0      | 10.5   | - 19.6  |
|                   | Manual workers             | -         | -      | -      | 36.4      | 31.5   | - 41.2 | 32.0      | 28.3   | - 35.6  | 31.8      | 27.2   | - 36.3  | 22.0      | 18.5   | - 25.5  |
|                   | Farmers                    | -         | -      | -      | 14.0      | 0.1    | - 27.9 | 44.3      | 4.6    | - 84.1  | 11.0      | 0.0    | - 32.4  | 72.5      | 8.6    | - 136.5 |
|                   | Self-employed              | -         | -      | -      | 16.9      | 13.2   | - 20.6 | 15.1      | 11.6   | - 18.5  | 10.1      | 7.3    | - 12.9  | 5.8       | 3.4    | - 8.2   |
| England and Wales | Upper non-manual employees | 18.1      | 2.1    | - 34.2 | 22.1      | 4.2    | - 39.9 | 13.3      | 8.0    | - 18.6  | 8.3       | 4.1    | - 12.4  | 6.0       | 1.6    | - 10.5  |
|                   | Lower non-manual employees | 26.2      | 18.4   | - 34.0 | 16.3      | 10.3   | - 22.3 | 3.9       | 0.0    | - 11.7  | 15.4      | 0.3    | - 30.5  | 14.5      | 0.0    | - 31.0  |
|                   | Manual workers             | 33.7      | 26.5   | - 41.0 | 29.5      | 22.7   | - 36.3 | 22.0      | 15.4   | - 28.6  | 16.9      | 11.0   | - 22.9  | 14.0      | 7.2    | - 20.9  |
|                   | Self-employed              | -         | -      | -      | -         | -      | -      | 22.6      | 12.4   | - 32.8  | 19.5      | 10.2   | - 28.7  | 5.3       | 0.0    | - 11.3  |
| Austria           | Non-manual employees       | 14.2      | 8.6    | - 19.8 | -         | -      | -      | 11.2      | 7.3    | - 15.1  | -         | -      | -       | 6.5       | 4.7    | - 8.2   |
|                   | Manual workers             | 20.3      | 13.4   | - 27.2 | -         | -      | -      | 14.0      | 8.2    | - 19.9  | -         | -      | -       | 8.6       | 6.5    | - 10.8  |
|                   | Farmers†                   | 12.9      | 1.3    | - 24.4 | -         | -      | -      | 6.6       | 0.0    | - 14.4  | -         | -      | -       | -         | -      | -       |
|                   | Self-employed              | 36.1      | 21.8   | - 50.3 | -         | -      | -      | 11.7      | 4.4    | - 18.9  | -         | -      | -       | 6.5       | 3.7    | - 9.3   |
| Switzerland*      | Upper non-manual employees | 10.3      | 8.7    | - 11.9 | 9.6       | 8.2    | - 11.0 | 6.0       | 4.7    | - 7.3   | 5.6       | 4.5    | - 6.7   | 4.2       | 3.1    | - 5.2   |
|                   | Lower non-manual employees | 20.4      | 15.7   | - 25.2 | 19.6      | 15.2   | - 24.0 | 12.6      | 8.5    | - 16.8  | 8.9       | 5.9    | - 11.8  | 10.9      | 7.4    | - 14.5  |
|                   | Manual workers             | 22.4      | 18.8   | - 25.9 | 22.6      | 19.2   | - 26.1 | 18.1      | 14.0   | - 22.2  | 15.0      | 11.6   | - 18.4  | 10.4      | 7.5    | - 13.4  |
|                   | Farmers                    | 11.4      | 7.3    | - 15.5 | 11.5      | 7.2    | - 15.8 | 8.9       | 4.4    | - 13.4  | 7.7       | 3.8    | - 11.7  | 6.5       | 2.2    | - 10.9  |
|                   | Self-employed              | 10.4      | 7.7    | - 13.1 | 13.1      | 10.1   | - 16.0 | 10.5      | 7.8    | - 13.1  | 7.1       | 5.0    | - 9.1   | 5.4       | 3.5    | - 7.4   |
| Italy (Turin)     | Upper non-manual employees | 22.4      | 14.4   | - 30.4 | 12.2      | 6.5    | - 17.9 | 9.1       | 4.6    | - 13.5  | 10.2      | 5.3    | - 15.0  | -         | -      | -       |
|                   | Lower non-manual employees | 30.7      | 22.0   | - 39.4 | 7.2       | 3.0    | - 11.5 | 10.5      | 5.4    | - 15.7  | 12.6      | 6.8    | - 18.5  | -         | -      | -       |
|                   | Manual workers             | 31.2      | 26.0   | - 36.4 | 20.3      | 15.8   | - 24.9 | 15.9      | 11.5   | - 20.4  | 11.4      | 7.4    | - 15.5  | -         | -      | -       |
|                   | Farmers††                  | -         | -      | -      | -         | -      | -      | 44.1      | 0.0    | - 130.4 | 0.0       | 0.0    | - 0.0   | -         | -      | -       |
|                   | Self-employed              | 24.8      | 16.9   | - 32.7 | 19.1      | 11.8   | - 26.3 | 12.3      | 6.5    | - 18.2  | 11.1      | 4.5    | - 17.7  | -         | -      | -       |
| Estonia*          | Upper non-manual employees | -         | -      | -      | -         | -      | -      | 57.2      | 45.5   | - 68.9  | 26.5      | 20.0   | - 33.0  | 20.8      | 12.4   | - 29.2  |
|                   | Lower non-manual employees | -         | -      | -      | -         | -      | -      | 100.2     | 56.3   | - 144.0 | 75.5      | 44.9   | - 106.2 | 10.2      | 0.0    | - 24.7  |
|                   | Manual workers             | -         | -      | -      | -         | -      | -      | 110.2     | 94.3   | - 126.1 | 69.3      | 58.9   | - 79.7  | 31.6      | 20.4   | - 42.8  |
|                   | Farmers                    | -         | -      | -      | -         | -      | -      | 80.1      | 62.5   | - 97.6  | 51.9      | 38.3   | - 65.4  | 24.5      | 10.0   | - 39.0  |
| Lithuania*        | Upper non-manual employees | -         | -      | -      | -         | -      | -      | 38.1      | 29.4   | - 46.8  | 48.4      | 39.1   | - 57.7  | 38.2      | 29.1   | - 47.4  |
|                   | Lower non-manual employees | -         | -      | -      | -         | -      | -      | 78.7      | 47.5   | - 109.9 | 78.8      | 51.4   | - 106.2 | 63.9      | 37.8   | - 90.0  |
|                   | Manual workers             | -         | -      | -      | -         | -      | -      | 87.1      | 77.2   | - 96.9  | 97.8      | 87.9   | - 107.7 | 91.8      | 78.6   | - 105.0 |
|                   | Farmers                    | -         | -      | -      | -         | -      | -      | 76.3      | 55.3   | - 97.3  | 81.4      | 58.9   | - 103.9 | 38.3      | 10.4   | - 66.1  |
|                   | Self-employed              | -         | -      | -      | -         | -      | -      | 58.8      | 47.5   | - 70.1  | 73.9      | 61.5   | - 86.2  | 38.3      | 25.7   | - 50.9  |

\* ASMRs are corrected for the exclusion of economically inactive

Supplementary Table S 10. Relative and absolute annualised changes in age-standardised mortality rates between end and beginning of observation periods for cardiovascular, ischaemic and cerebrovascular disease mortality, by upper non-manual and manual occupation, men, 35-64 years

|                   |                            | Cardiovascular disease |          | Ischaemic heart disease |          | Cerebrovascular disease |          |
|-------------------|----------------------------|------------------------|----------|-------------------------|----------|-------------------------|----------|
|                   |                            | relative               | absolute | relative                | absolute | relative                | absolute |
| Finland           | Upper non-manual employees | -4.8                   | -5.7     | -5.9                    | -4.2     | -5.7                    | -1.1     |
|                   | Manual workers             | -3.6                   | -10.3    | -4.6                    | -8.3     | -4.2                    | -1.7     |
| Denmark*          | Upper non-manual employees | -5.5                   | -4.5     | -7.8                    | -3.1     | -4.3                    | -0.6     |
|                   | Manual workers             | -4.3                   | -6.8     | -5.9                    | -4.9     | -3.3                    | -1.0     |
| England and Wales | Upper non-manual employees | -6.5                   | -7.8     | -6.3                    | -5.5     | -5.9                    | -0.7     |
|                   | Manual workers             | -5.6                   | -10.4    | -7.0                    | -9.1     | -4.8                    | -1.1     |
| Austria           | Non-manual employees       | -3.9                   | -3.3     | -4.2                    | -2.3     | -3.9                    | -0.4     |
|                   | Manual workers             | -3.6                   | -3.9     | -3.4                    | -2.3     | -4.2                    | -0.6     |
| Switzerland*      | Upper non-manual employees | -4.5                   | -3.7     | -5.3                    | -2.5     | -4.7                    | -0.3     |
|                   | Manual workers             | -3.7                   | -6.3     | -4.3                    | -3.7     | -3.9                    | -0.6     |
| Italy (Turin)**   | Upper non-manual employees | -3.8                   | -6.6     | -3.4                    | -1.4     | -4.8                    | -1.4     |
|                   | Manual workers             | -4.1                   | -9.5     | -3.6                    | -2.0     | -6.1                    | -1.9     |
| Estonia*          | Upper non-manual employees | -6.0                   | -13.3    | -8.0                    | -9.2     | -8.8                    | -3.3     |
|                   | Manual workers             | -4.4                   | -20.7    | -5.9                    | -13.3    | -10.7                   | -7.1     |
| Lithuania*        | Upper non-manual employees | -0.3                   | -0.7     | -0.3                    | -0.4     | 0.0                     | 0.0      |
|                   | Manual workers             | 0.1                    | 0.4      | -0.4                    | -1.4     | 0.5                     | 0.5      |

\* Age-standardised mortality rates are corrected for the exclusion of economically inactive,\*\* Annualised changes between 1990-94 and 2005-09

Supplementary Table S 11. Population-Attributable Risk (PAR, per 100,000 person-year) and Population-Attributable Fraction (PAF, %) of occupational class for cardiovascular disease mortality, ischaemic heart disease mortality and cerebrovascular disease mortality between beginning of observation periods and 2010-14

|                                | PAR (100000pyrs) |             | PAF (%)  |             | AID (absolute version) |             | AID (relative version) |             |
|--------------------------------|------------------|-------------|----------|-------------|------------------------|-------------|------------------------|-------------|
|                                | 1990-94*         | 2010-2014** | 1990-94* | 2010-2014** | 1990-94*               | 2010-2014** | 1990-94*               | 2010-2014** |
| <b>Cardiovascular disease</b>  |                  |             |          |             |                        |             |                        |             |
| <b>Finland</b>                 | 136.8            | 75.8        | 43.3     | 52.1        | 43.8                   | 27.1        | 14.2                   | 19.5        |
| <b>Denmark</b>                 | 57.2             | 32.6        | 32.9     | 39.7        | 24.3                   | 15.8        | 15.2                   | 20.4        |
| <b>England and Wales</b>       | 57.2             | 29.4        | 22.3     | 33.0        | 23.5                   | 10.5        | 9.5                    | 13.6        |
| <b>Austria</b>                 | 115.2            | 39.1        | 49.1     | 42.3        | 5.9                    | 4.9         | 4.9                    | 8.2         |
| <b>Switzerland</b>             | 41.8             | 19.5        | 25.5     | 27.8        | 23.5                   | 13.3        | 14.9                   | 18.3        |
| <b>Italy (Turin)</b>           | 50.8             | 24.5        | 32.6     | 30.3        | 8.6                    | 5.5         | 6.0                    | 7.7         |
| <b>Estonia</b>                 | 221.2            | 145.5       | 42.9     | 49.4        | 68.4                   | 50.5        | 15.0                   | 19.8        |
| <b>Lithuania</b>               | 234.6            | 173.7       | 45.7     | 39.0        | 55.4                   | 74.3        | 12.2                   | 18.3        |
| <b>Ischaemic heart disease</b> |                  |             |          |             |                        |             |                        |             |
| <b>Finland</b>                 | 97.9             | 42.6        | 45.5     | 53.6        | 30.5                   | 15.7        | 14.5                   | 20.7        |
| <b>Denmark</b>                 | 33.6             | 16.0        | 33.6     | 44.9        | 14.4                   | 7.6         | 15.6                   | 22.2        |
| <b>England and Wales</b>       | 47.9             | 13.5        | 25.0     | 23.3        | 21.6                   | 4.0         | 11.7                   | 7.8         |
| <b>Austria</b>                 | 56.0             | 21.9        | 41.2     | 39.3        | 3.7                    | 2.9         | 5.0                    | 7.7         |
| <b>Switzerland</b>             | 19.8             | 9.1         | 21.3     | 26.1        | 11.5                   | 6.1         | 12.9                   | 16.9        |
| <b>Italy (Turin)</b>           | 22.3             | 11.3        | 29.9     | 27.2        | 3.8                    | 2.2         | 5.4                    | 6.1         |
| <b>Estonia</b>                 | 110.9            | 59.6        | 39.7     | 47.1        | 31.6                   | 21.7        | 13.0                   | 19.5        |
| <b>Lithuania</b>               | 139.4            | 97.6        | 44.9     | 37.0        | 32.5                   | 39.5        | 11.8                   | 16.6        |
| <b>Cerebrovascular disease</b> |                  |             |          |             |                        |             |                        |             |
| <b>Finland</b>                 | 16.6             | 10.0        | 35.6     | 50.7        | 5.8                    | 3.4         | 12.8                   | 17.8        |
| <b>Denmark</b>                 | 11.5             | 6.6         | 39.0     | 41.6        | 4.7                    | 3.7         | 17.9                   | 24.2        |
| <b>England and Wales</b>       | 13.1             | 5.2         | 41.8     | 46.3        | 2.4                    | 2.1         | 8.1                    | 22.4        |
| <b>Austria</b>                 | 21.1             | 5.1         | 59.8     | 43.9        | 3.0                    | 0.5         | 16.1                   | 6.7         |
| <b>Switzerland</b>             | 4.4              | 2.3         | 29.9     | 36.0        | 2.5                    | 1.5         | 18.2                   | 22.6        |
| <b>Italy (Turin)</b>           | 8.0              | 2.6         | 26.4     | 20.6        | 1.8                    | 0.4         | 6.3                    | 4.0         |
| <b>Estonia</b>                 | 45.1             | 10.9        | 44.1     | 34.3        | 12.7                   | 3.5         | 14.5                   | 13.9        |
| <b>Lithuania</b>               | 42.7             | 35.8        | 52.8     | 48.3        | 10.5                   | 13.3        | 15.0                   | 20.2        |

\* 1995-99 for Denmark, 2000-04 for Estonia and Lithuania, \*\*2005-09 for Italy (Turin)

Supplementary Figure S 1. Trend in ischaemic heart disease mortality (ASMR: age-standardised mortality rates) and inequalities (Relative and Slope Index of Inequality) in mortality by educational level, population and gender, 35-79 years

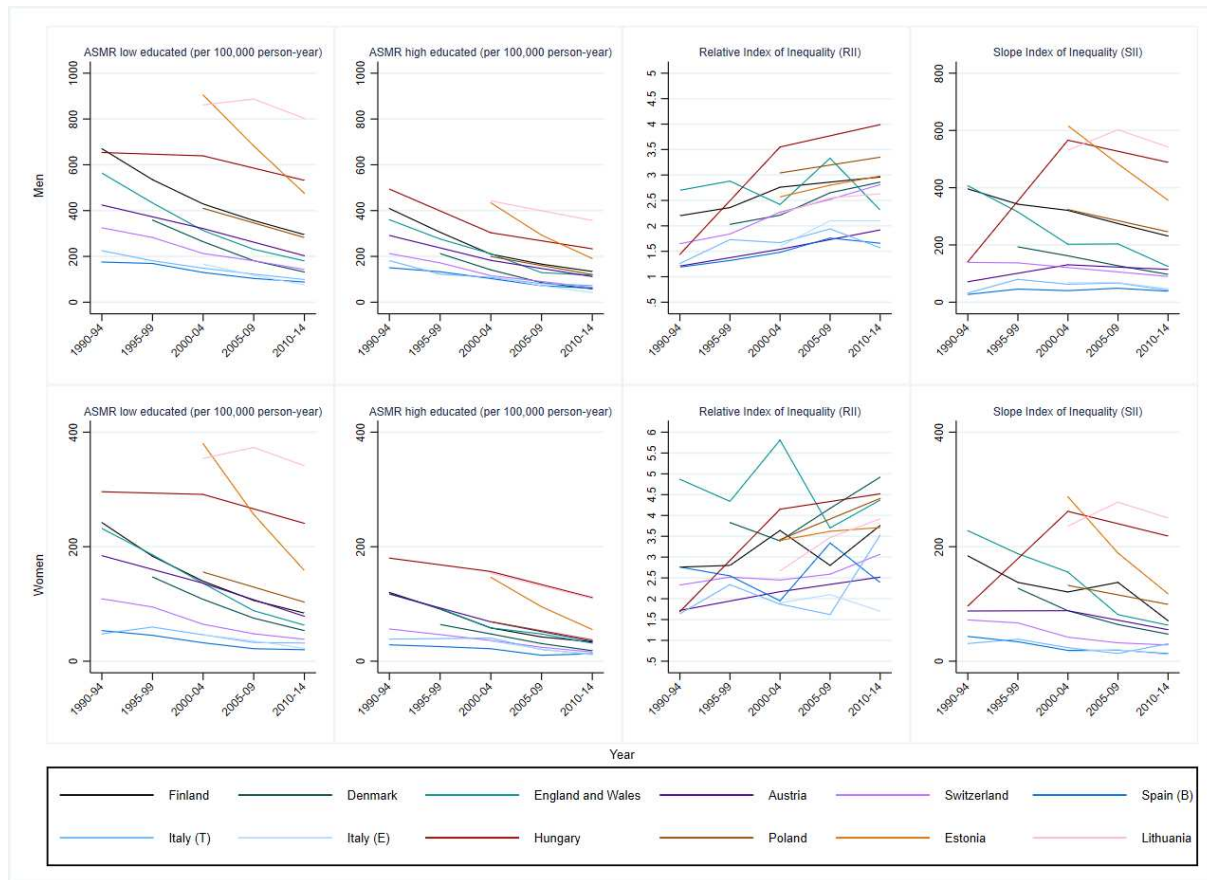

Supplementary Figure S 2. Trend in cerebrovascular disease mortality (ASMR: age-standardised mortality rates) and inequalities (Relative and Slope Index of Inequality) in mortality by educational level, population and gender, 35-79 years

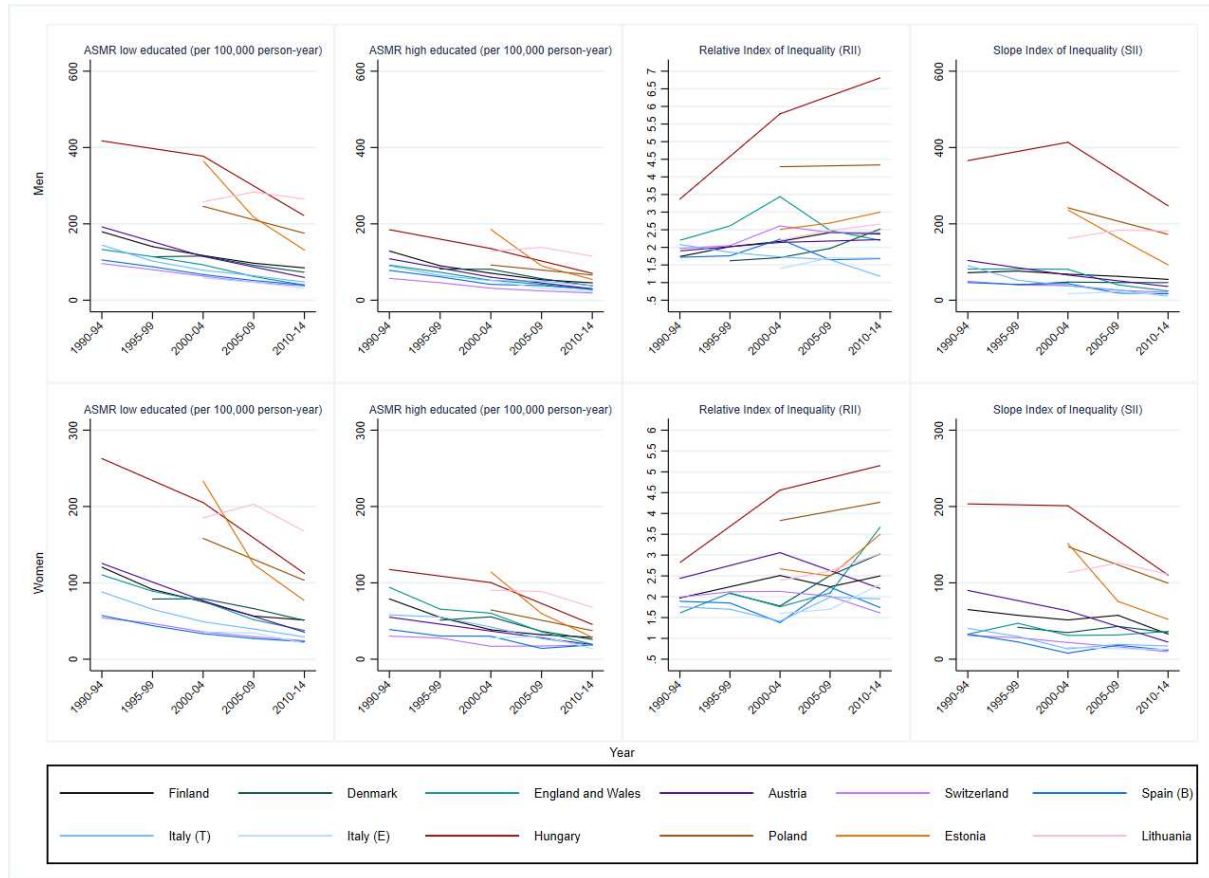

Supplementary Figure S 3. Changes in absolute and relative educational inequalities in ischaemic heart disease mortality between 2000-04 (period in which data became available for all populations) and 2010-14, by population and gender, 35-79 years

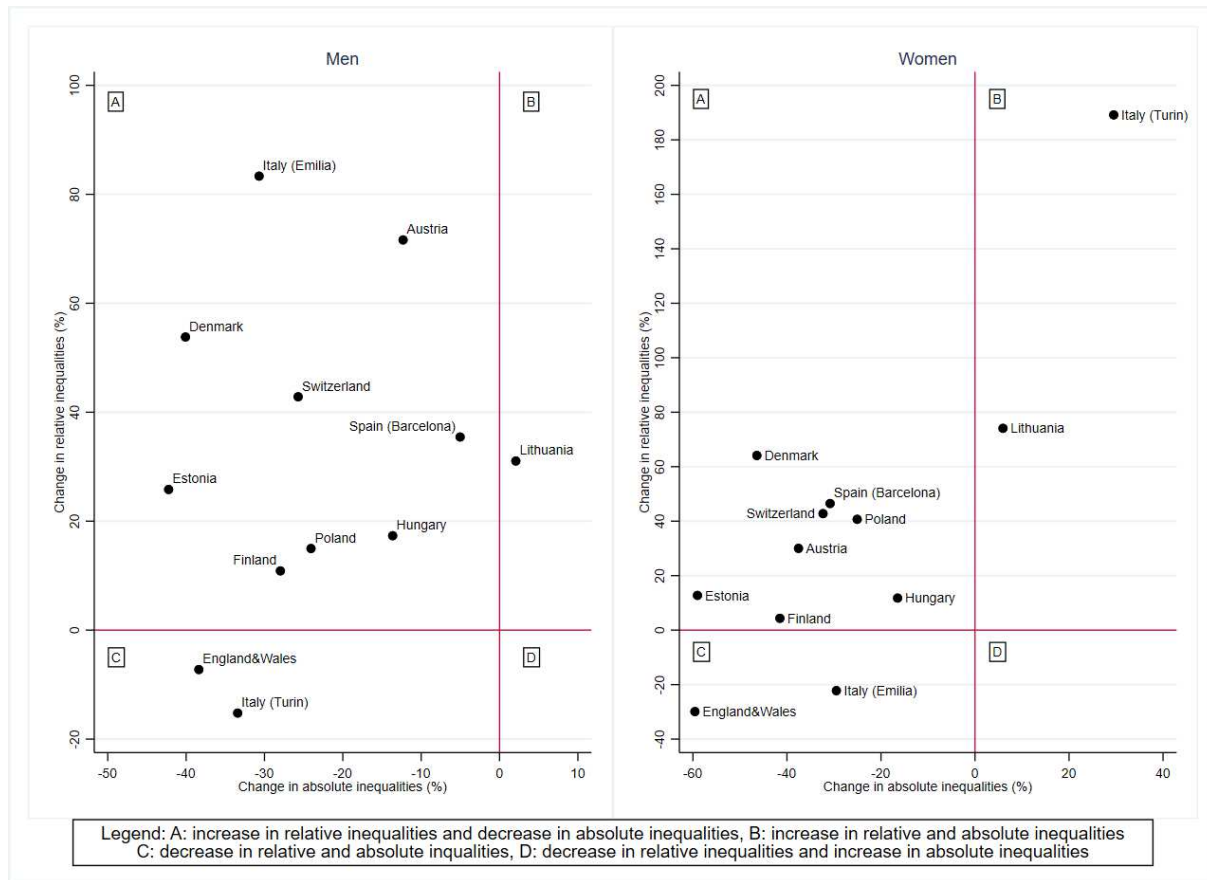

Note: changes in relative inequalities (ratio measures) were calculated using the following formula where RII stands for Relative Index of Inequality:  $100 * (RII_{2010-14} - RII_{2000-04}) / (RII_{2000-04} - 1)$ . Changes in absolute inequalities (difference measures) were calculated using the following formula where SII stands for Slope Index of Inequality:  $100 * (SII_{2010-14} - SII_{2000-04}) / (SII_{2000-04})$ .

Supplementary Figure S 4. Changes in absolute and relative educational inequalities in cerebrovascular disease mortality between 2000-04 (period in which data became available for all populations) and 2010-14, by population and gender, 35-79 years

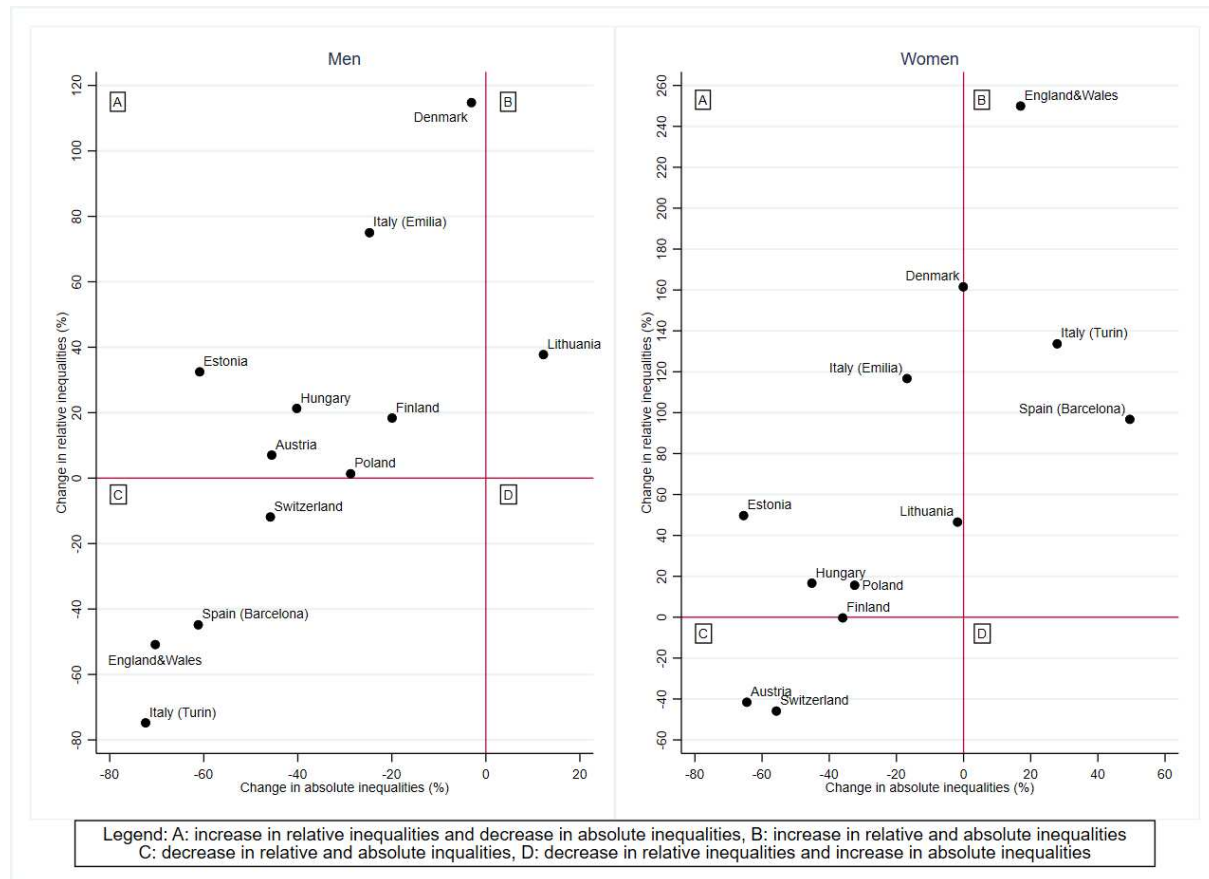

Note: changes in relative inequalities (ratio measures) were calculated using the following formula where RII stands for Relative Index of Inequality:  $100 * (RII_{2010-14} - RII_{2000-04}) / (RII_{2000-04} - 1)$ . Changes in absolute inequalities (difference measures) were calculated using the following formula where SII stands for Slope Index of Inequality:  $100 * (SII_{2010-14} - SII_{2000-04}) / (SII_{2000-04})$ .



Supplementary Figure S 5. Trends in cardiovascular disease mortality (ASMR: age-standardised mortality rates) and inequalities (Average Inter-group Difference, relative and absolute version) by occupation class, men, 35-64 years

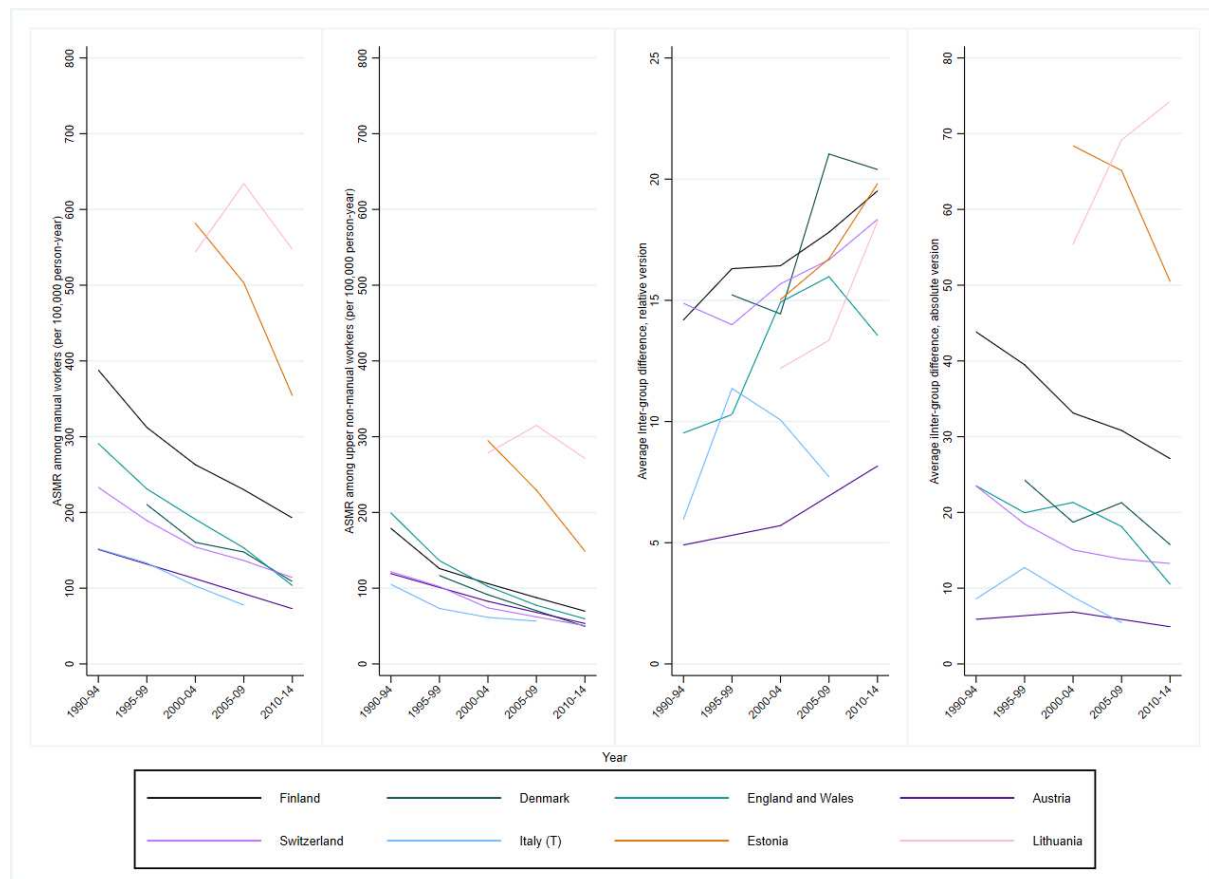

Note: AID relative and absolute versions were computed based on five occupational classes (upper non-manual, lower non-manual, manual, farmers and self-employed; for England and Wales self-employed was not available before 2000, for Austria upper non-manual and lower non-manual were grouped and farmers were only available for the years 1991 and 2001, for Estonia the category self-employed was not available).

Supplementary Figure S 6. Trends in inequalities (Relative and Slope Index of Inequality) for ischaemic heart disease and other heart diseases mortality by educational level, population and gender, 36-79 years

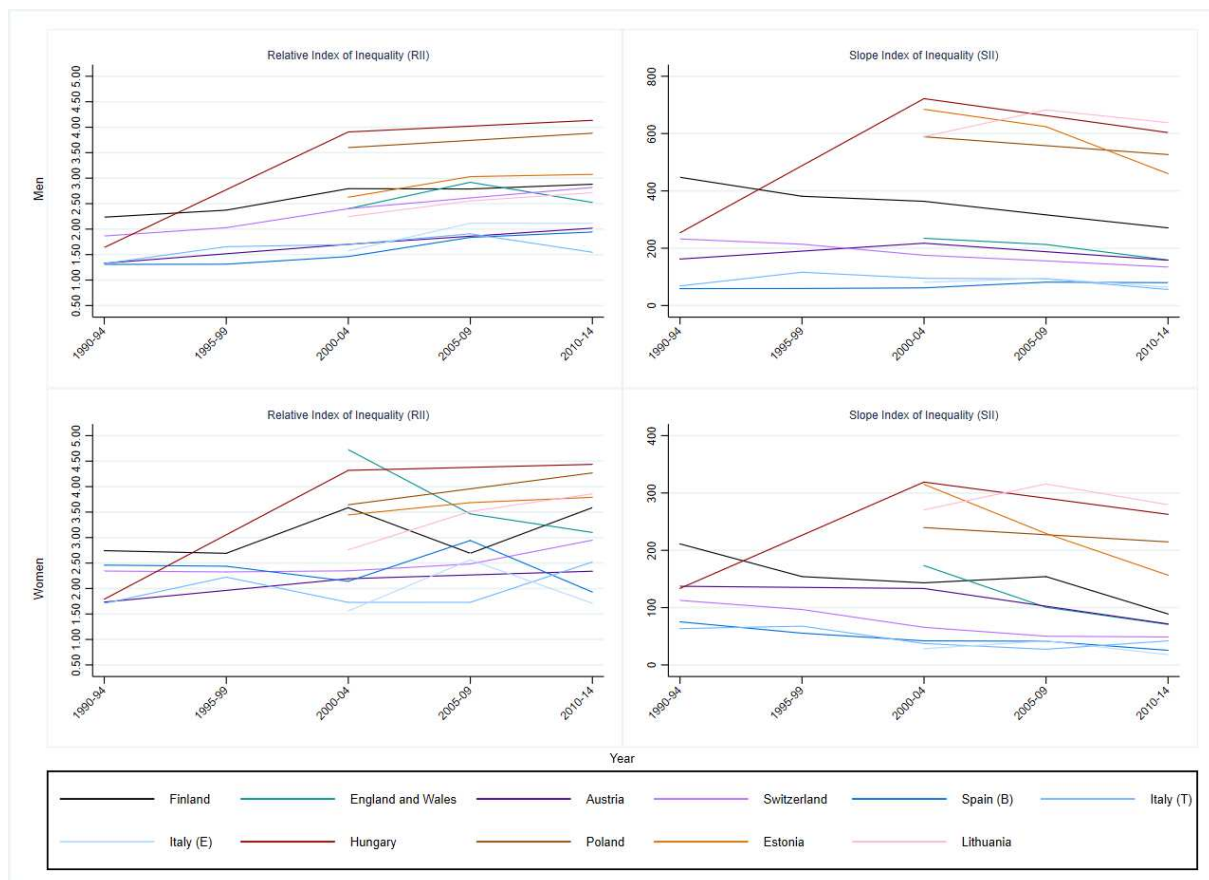

Note: For Denmark, it was not possible to estimate the RII and the SII for ischaemic and other heart diseases combined because the second group was not available in the data; for England and Wales information on other heart diseases were available since 2001.
